1 Genomic heritability estimates in sweet cherry reveal non-additive  
2 genetic variance is relevant for industry-prioritized traits

3

4 J. Piaskowski\* (corresponding author)

5 Craig Hardner<sup>†</sup>

6 Lichun Cai<sup>‡</sup>

7 Yunyang Zhao<sup>§</sup>

8 Amy Iezzoni<sup>‡</sup>

9 Cameron Peace\*

10 \*Department of Horticulture, Washington State University, Pullman, WA 99164-6414

11 <sup>†</sup>Centre for Plant Science, Queensland Alliance for Agriculture and Food Innovation, University of  
12 Queensland, Brisbane, Australia

13 <sup>‡</sup>Department of Horticulture, Michigan State University, East Lansing, MI 48824-1325

14 <sup>§</sup>Plant for Human Health Institute, North Carolina State University, Kannapolis, NC 28081

15

16

17 **ABSTRACT**

18 **Background:** Sweet cherry is consumed widely across the world and provides substantial economic  
19 benefits in regions where it is grown. While cherry breeding has been conducted in the Pacific Northwest  
20 for over half a century, little is known about the genetic architecture of important traits. We used a  
21 genome-enabled mixed model to predict the genetic performance of 505 individuals for 32 phenological,  
22 disease response and fruit quality traits evaluated in the RosBREED sweet cherry crop data set.  
23 Genome-wide predictions were estimated using a repeated measures model for phenotypic data across 3  
24 years, incorporating additive, dominance and epistatic variance components. Genomic relationship  
25 matrices were constructed with high-density SNP data and were used to estimate relatedness and  
26 account for incomplete replication across years.

27 **Results:** High broad-sense heritabilities of 0.83, 0.77, and 0.75 were observed for days to maturity,  
28 firmness, and fruit weight, respectively. Epistatic variance exceeded 40% of the total genetic variance for  
29 maturing timing, firmness and powdery mildew response. Dominance variance was the largest for fruit  
30 weight and fruit size at 34% and 27%, respectively. Omission of non-additive sources of genetic variance  
31 from the genetic mode resulted in inflation of narrow-sense heritability but minimally influenced prediction  
32 accuracy of genetic values in validation. Predicted genetic rankings of individuals from single-year models  
33 were inconsistent across years, likely due to incomplete sampling of the population genetic variance.

34 **Conclusions:** Predicted breeding values and genetic values a measure revealed many high-performing  
35 individuals for use as parents and the most promising selections to advance for cultivar release  
36 consideration, respectively. This study highlights the importance of using the appropriate genetic model  
37 for calculating breeding values to avoid inflation of expected parental contribution to genetic gain. The  
38 genomic predictions obtained will enable breeders to efficiently leverage the genetic potential of North  
39 American sweet cherry germplasm by identifying high quality individuals more rapidly than with  
40 phenotypic data alone.

41 **Keywords:**

- 42 • GBLUP
- 43 • sweet cherry
- 44 • *Prunus*
- 45 • genomic selection
- 46 • non-additive genetic variation

47

## 48 **BACKGROUND**

49 Sweet cherry (*Prunus avium* L.) is a lucrative fresh market horticultural crop whose monetary worth is  
50 directly and indirectly determined by several horticultural and fruit traits. Worldwide, more than 2.8 million  
51 tons of sweet cherry fruit were produced in 2014 [1]. In 2015, the U.S. was the second largest producer of  
52 cherries, producing 338.6 kilotons of fruit valued at \$703 million, of which 60% were grown in Washington  
53 State [2,3].

54 Sweet cherry cultivars must garner a positive critical reception among growers, market  
55 intermediaries (a category which includes packers, shippers, and marketers), and consumers to succeed  
56 commercially. The U.S. sweet cherry industry and consumers have previously prioritized which fruit trait  
57 thresholds are essential for a successful cultivar. Sweet cherry producers identified fruit size, flavor,  
58 firmness, and powdery mildew resistance as trait priorities in a survey conducted in 2011 [4]. Powdery  
59 mildew (causative agent *Podosphaera clandestine*) is a foliar and fruit disease with a high cost of control  
60 in susceptible cultivars. Sweetness and flavor were ranked by consumers as the most important attributes  
61 in sweet cherry, followed by firmness, shelf life, and fruit size [5]. Consumers are willing to pay more for  
62 sweet, firm cherries with an ideal balance of sweetness and acidity. Sweetness and acidity are quantified  
63 with assays for soluble solids content (SSC) and titratable acidity (TA), respectively [5–8]. Market  
64 intermediaries indicated a willingness to pay producers more per pound for fruit greater than 2.5 cm in  
65 diameter, firmness above 300 g/mm, and SSC above 18° Brix [9]. Market intermediaries also ranked fruit  
66 size as the most important trait, followed by firmness and external appearance [10]. The USDA  
67 Agriculture Marketing Service evaluates skin color, fruit size, and fruit firmness when grading sweet  
68 cherries [11], an assessment which influences market receipts for that crop.

69 Many of the trait thresholds identified by consumers and the cherry industry alike have been  
70 individually met or exceeded through genetic improvement. Beginning with the 1952 release of 'Rainier', a  
71 highly popular sweet cherry cultivar, the Washington State University sweet cherry program (formerly  
72 USDA-ARS) has released several dozen cultivars with improved flavor, size, and firmness in each  
73 subsequent release [12,13]. This program and others have largely relied on phenotypic selection  
74 complemented with trait-predictive DNA tests for high heritability traits, such as fruit skin color and self-  
75 compatibility [13–16]. The Washington State University breeding program has seen genetic gains in fruit

76 dimensions, firmness and other traits of breeding relevance due to moderate heritability of those traits  
77 [17–19].

78 Sweet cherry has a juvenility period of three to five years before a tree is capable of flowering and  
79 producing fruit [20]. Therefore, the pace of cultivar release is slow, taking 15 to 25 years between making  
80 a cross to cultivar release [16]. Sweet cherry breeding is structured like many other crops: an initial set of  
81 crosses is made, followed by evaluation of a large number of offspring. After a rapid screening, the  
82 majority of these offspring is discarded, and the remaining selections are evaluated more extensively in  
83 replicated trials. Selections are clonally propagated in subsequent evaluations. Consequently, the genetic  
84 potential identified in F1 seedlings remains fixed throughout the evaluative phases of a breeding program  
85 and is not lost during recombination and segregation.

86 Understanding the genetic architecture of crop traits can help plant geneticists and allied  
87 scientists maximize genetic gain and elucidate the genetic potential of seedlings and parents. Best linear  
88 unbiased prediction (BLUP) is an analysis tool that is used to estimate the genetic potential of each  
89 individual from unbalanced trials by modeling genetic effects as a random effect in a mixed model [21]. It  
90 requires prior estimation of genetic variance components, which are obtained through maximum  
91 likelihood, restricted maximum likelihood (REML) or Bayesian approaches [22,23]. Pedigree-based  
92 BLUPs have been developed to leverage information from related individuals. This is used to estimate the  
93 genetic potential that a parent can pass to its offspring and is termed “breeding value” [24]. Genomic  
94 BLUPs (GBLUPs) are an extension of pedigree-based BLUPS, using DNA marker information instead of  
95 pedigree information to construct a realized relationship matrix between individuals in a population. The  
96 realized relationship matrix can more accurately estimate relatedness, particularly among full siblings,  
97 than the pedigree-based relationship matrix [25–27]. The resultant breeding values are expected to more  
98 closely mirror the true genetic potentials of individuals [28–30].

99 Breeding values derived from BLUPs have been used to successfully identify superior individuals  
100 in several rosaceous crops including apple, peach, raspberry, and strawberry [31–37]. Extensive work  
101 has been done in apple to estimate the breeding values from unreplicated trials [31,33,38,39]. Breeders  
102 have observed enhanced genetic gain using both pedigree-based and genome estimated breeding  
103 values in other perennial tree crops, including citrus, rubber and *Eucalyptus* [40–43]. Sweet cherry shares

104 many of the breeding scheme challenges of apple and other perennial tree crops: unbalanced trials and a  
105 long juvenility period. Hence, the same methodologies can be utilized.

106 Additive effects are considered to be the largest component of genetic variance that is passed to  
107 progeny [44]. While many genome-wide approaches including GBLUPs have been employed to estimate  
108 breeding values across crops, these methods are almost solely focused on estimating additive effects  
109 alone as a proxy for total genetic effects. Few studies have examined non-additive genetic variance  
110 components in rosaceous crops [45]. Kumar et al. [45] reported on a comprehensive study estimating  
111 sources of genetic variance for 32 traits in apple across 17 families and two locations using GBLUPs.

112 In cherry, there are few published accounts that utilize BLUPs or other genome-wide DNA-  
113 enabled approaches for estimating the genotypic value of individuals. The only published genome-wide  
114 study in sweet cherry estimated breeding values for cherry fruit size in U.S.-relevant germplasm from  
115 large-effect QTLs in a Bayesian analysis, but it did not include genetic background effects [18]. There is  
116 no published information on the genome-wide additive and non-additive variance components and  
117 prediction of the genetic value of individuals for any sweet cherry trait.

118 This study addresses a deficiency of published information on genetic parameters for sweet  
119 cherry breeding-relevant traits beyond those influenced primarily by large-effect QTLs by obtaining robust  
120 estimates of genetic variance components. To ensure wide applicability of the study for cherry, we used a  
121 large set of sweet cherry breeding germplasm. These data were gathered from germplasm in public  
122 sweet cherry breeding programs as part of RosBREED project [46]. Our objectives were to: (1) estimate  
123 variance components across a broad spectrum of traits in sweet cherry germplasm important to North  
124 American breeders and producers, and (2) assess the predictive accuracy of obtained genome-estimated  
125 breeding values (GEBVs) for a subset of the most valuable traits. Previous studies show that the  
126 genome-estimated breeding values of individuals that are robust across years and families can increase  
127 the pace and efficiency of breeding. Specifically, valuable cherry parents can be identified more quickly  
128 and with greater confidence than those obtained through phenotypic data alone.

129

130

131

## 132 **METHODS**

### 133 *Germplasm*

134 We used all individuals from the RosBREED sweet cherry Crop Reference Set with genome-wide SNP  
135 data, totaling 505 individuals (Additional File 1). This set consisted of cultivars (n = 42), wild accessions (n  
136 = 3), unreleased selections (n = 24), and unselected offspring (n = 436) from 66 families. The unselected  
137 offspring category includes 77 F1 offspring derived from a wild parent and 359 F1 offspring derived from  
138 existing cultivars. Trees were grown at two sites in Washington State (U.S.A.) located approximately 0.5  
139 km apart: the Irrigated Agriculture Research and Extension Center of Washington State University Roza  
140 Unit, (46 °29'N and 119 °73'W) and at Pear Acres (46 °29'N and 119 °75'W). Each tree was planted in  
141 2006, 2007, or 2008 and managed using conventional orchard management practices. Unselected  
142 offspring were grown on their own roots, and the remaining germplasm were grown on Gisela 6 rootstock  
143 [47]. A single tree was used for each individual. The Crop Reference Set was established to represent  
144 North American sweet cherry breeding germplasm for QTL identification and validation and other  
145 quantitative genetics endeavors [48].

### 146 *Phenotypic data*

147 This study used the sweet cherry phenotypic data set previously described in Chavoshi et al. [49]  
148 obtained in the RosBREED project. This data set consisted of 32 traits evaluated in 2010, 2011, and  
149 2012. Standardized phenotyping protocols for sweet cherry [49] were used. For individual fruit traits, the  
150 five largest fruit without blemish were measured and averaged. In the case of pitting and cracking, the  
151 proportion of fruit observed with symptoms out of 25 fruit was recorded. Bulked fruit traits (bulk fruit  
152 weight, bulked firmness, bulked SSC, and bulked TA) were reported as the average of measurements  
153 over 25 fruit.

154 Nine traits of the 32 were focused on here because of their importance in new sweet cherry  
155 cultivars: time to bloom, time to maturity, pedicel-fruit retention force (PFRF), fruit dimensions, fruit weight,  
156 firmness, SSC, TA, and powdery mildew incidence. Time to bloom and time to maturity were measured  
157 both in Julian calendar days starting from January 1<sup>st</sup> of the calendar year and in growing degree days  
158 (GDD). The force required to pull a ripe cherry fruit from its pedicel, PFRF, and fruit weight were both  
159 measured in grams. Firmness, SSC, and TA were measured in units of g/mm, Brix°, and percentage,

160 respectively. Foliar powdery mildew incidence was scored in August of each year, immediately after the  
161 fruiting season, on a 0-5 scale, where 0 is no infection and 5 is highly infected leaves. These nine traits  
162 are referred to as “focus traits” for the rest of the study. All trait data were measured over three years  
163 except for powdery mildew incidence, which was not assayed in 2010. Results from the other traits are  
164 given in the supplementary material, but not discussed.

165 Several transformations of the trait data were performed for the focus traits. “Fruit dimensions”  
166 was determined newly here as the first component from a principal component analysis between fruit  
167 length and fruit width, which are both end-to-end fruit measurements in millimeters. The first principal  
168 component summarized 95.4% of total phenotypic variation for fruit length and width. Growing degree  
169 days was calculated for an alternative measure of phenological traits. Climatic data was obtained from  
170 Washington State University's AgWeatherNet using the “Roza” station [50], using a base temperature of  
171 4.5 °C and maximum of 30 °C. Daily maximum temperatures above 30 °C were reduced to 30 °C, and  
172 negative temperatures were set to zero, following McMaster and Wilhelm [51]. Erroneous data points,  
173 defined as those larger than twice the next largest value or less than one-half of the next smallest value  
174 and having a studentized residual with an absolute value greater than 5, were removed. Such data were  
175 assumed to be data entry errors. There were 97 individuals with no phenotypic data: 13 selections and 84  
176 unselected progeny. These individuals were used in the model-building and prediction steps for all  
177 models except for cross validation.

#### 178 *SNP data*

179 The SNP data were obtained from the RosBREED project using the RosBREED cherry 6K SNP array v1  
180 (an Illumina Infinium® II array) [52]. The SNP curation pipeline is described in Cai et al [53]. Missing data  
181 were imputed with Beagle as implemented in SynBreed [54,55] using the hidden Markov model and a  
182 minor allele frequency of 0.05. Individuals or SNPs missing more than 25% data were removed from  
183 analysis and the SNP. In total, a genome-wide set of 1615 SNPs was used.

#### 184 *Statistical modeling*

185 Variance components were estimated with R-ASReml 3.0 [56], and additional statistical analyses were  
186 conducted in R v3.4 [57]. The following model was used for initial estimates of genetic effects for a single  
187 trait,  $\mathbf{Y}$  :

188

$$\mathbf{Y} = \mathbf{X}\mathbf{b} + \mathbf{Z}_1\mathbf{a} + \mathbf{Z}_2\mathbf{d} + \mathbf{Z}_3\mathbf{i} + \mathbf{Z}_4\mathbf{a}_Y + \mathbf{Z}_5\mathbf{d}_Y + \mathbf{Z}_6\mathbf{i}_Y + \mathbf{e}$$

189

where  $\mathbf{a}$ ,  $\mathbf{d}$ ,  $\mathbf{i}$ ,  $\mathbf{a}_Y$ ,  $\mathbf{d}_Y$  and  $\mathbf{i}_Y$  are the random variables for additive effects, dominance effects, effects

190

from additive-by-additive epistatic, additive-by-year effects, dominance-by-year effects, and epistasis-by-

191

year effects, respectively. Variables  $\mathbf{Z}_{1-3}$  and  $\mathbf{Z}_{4-6}$  are design matrices for main effects and interaction

192

terms, respectively. Dimensions of  $\mathbf{Z}_{1-3}$  are  $nY \times Y$  and  $\mathbf{Z}_{4-6}$  are  $nY \times nY$ , where  $n$  is the number of

193

individuals and  $Y$  is the number of years with trait data for an individual. Year was treated as a fixed

194

effect, where  $\mathbf{X}$  is the design matrix relating observations to years and  $\mathbf{b}$  is a vector of fixed effects due to

195

year. In a preliminary analysis, the effect of location was evaluated as a fixed effect using a Wald test.

196

Location did not have a significant effect on the focus traits ( $p$ -value > 0.10) and was omitted from the

197

model. Random variables were assumed to follow a normal distribution:

198

$$\begin{aligned} \mathbf{a} &\sim N(0, \mathbf{G}_a \sigma_a^2), \mathbf{d} \sim N(0, \mathbf{D} \sigma_d^2), \mathbf{i} \sim N(0, \mathbf{G}_{aa} \sigma_{aa}^2), \\ \mathbf{a}_Y &\sim N(0, \mathbf{I}_Y \otimes \mathbf{G}_a \sigma_{aY}^2), \mathbf{d}_Y \sim N(0, \mathbf{I}_Y \otimes \mathbf{D} \sigma_{dY}^2), \mathbf{i}_Y \sim N(0, \mathbf{I}_Y \otimes \mathbf{G}_{aa} \sigma_{aaY}^2) \\ \mathbf{e} &\sim N(0, \mathbf{R}) \end{aligned}$$

199

The covariance structure for year was modeled as a repeated measure:  $\mathbf{R} = \mathbf{I}_{Individual} \otimes \mathbf{e}_Y$  where

200

$\mathbf{I}_{Individual}$  is an identity matrix of individuals included in the study and  $\mathbf{e}_Y$  is a  $3 \times 3$  matrix of year error

201

terms using a general correlation structure implemented in ASReml. The genomic additive relationship

202

matrix was computed with R/rrBLUP [58] using the VanRaden method [59]:

203

$$\mathbf{G}_a = \frac{\mathbf{H}\mathbf{H}'}{2 \sum p_i(1-p_i)}$$

204

where  $p_i$  is frequency of the positive allele for a single marker column, and  $\mathbf{H}$  was computed as equal to

205

centered marker data,  $\{H\}_{ij} = \{M\}_{ij} - 2(p_i - 0.5)$ .  $\mathbf{M}$  is an  $n \times m$  marker matrix with  $n$  individuals and  $m$

206

markers expressed as (-1,0,1) frequency. The dominance relationship matrix was computed using

207

normalized matrices described by Su et al. [60] and implemented using a custom R program [61]:

208

$$\mathbf{D} = \frac{\mathbf{Z}\mathbf{Z}'}{\sum_i 2p_i(1-p_i)(1-2p_i(1-p_i))}$$



209 where the  $\mathbf{Z}$  matrix is a transformation of the marker matrix,  $\mathbf{M}$ :

$$\{Z\}_{ij} = \begin{cases} -2p_i(1-p_i) & \text{if } m_{ij} = -1 \\ 1-2p_i(1-p_i) & \text{if } m_{ij} = 0 \\ -2p_i(1-p_i) & \text{if } m_{ij} = 1 \end{cases}$$

210

211 The epistatic relationship matrix for additive by additive effects was computed by taking the Hadamard  
212 product between  $\mathbf{G}_a$ , the additive genomic relationship matrix, and itself:  $\mathbf{G}_{aa} = \mathbf{G}_a \circ \mathbf{G}_a$ .

213 When a relationship matrix was not positive definite, a small constant of  $1e^{-6}$  was added to the first  
214 eigenvector, and the matrix was inverted.

215 The full model included additive, dominance, and epistatic main effects and their interactions with  
216 year and is also called the “ADI model” in this paper. Model fit was assessed by checking for model  
217 convergence, examining studentized residuals for each trait by year combination, and examining the  
218 extended hat matrix for influential observations. The default model convergence criteria for ASReml were  
219 used, in which the final iteration must satisfy the following conditions: a change log likelihood less than  
220  $0.002 * \text{previous log likelihood}$ , and the variance parameters estimates change less than 1% from the  
221 previous iteration. The extended hat matrix for linear mixed models is:

222

$$\mathbf{WC}^{-1}\mathbf{W}'$$

223

$$\text{Where } \mathbf{C} = \mathbf{W}'\mathbf{R}^{-1}\mathbf{W} + \begin{pmatrix} \mathbf{0} & \mathbf{0} \\ \mathbf{0} & \mathbf{G}^{-1} \end{pmatrix} \text{ and } \mathbf{W} = [\mathbf{X} \quad \mathbf{Z}]$$

224 Influential data points were those with a value greater than 2 times the average value of the diagonal of  
225 the hat matrix excluding zeros.

226 The statistical significance of main effects and interactions were tested by first generating  
227 reduced models and then performing log-likelihood ratio tests between full and reduced models. To  
228 account for positively-bound variance component estimates, a mixture of Chi-square distributions as  
229 implemented in the R package asremlPlus [62] was used. Non-significant values from the log likelihood  
230 ratio tests were interpreted as the reduced models being as effective as the full model in modeling the  
231 response variable. Heritability numerators were estimated as  $\sigma_a^2$  for narrow-sense heritability ( $h^2$ ) and as  
232  $\sigma_a^2 + \sigma_d^2 + \sigma_{aa}^2$  for broad-sense heritability ( $H^2$ ); both were divided by the sum of the variance components

233 for final heritability estimates. Genetic values were computed as the sum of main effects for **a**, **d** and **i** for  
234 an individual, following the methodology of Kumar et al. [45]. Genotype-by-year effects are the sum of **a<sub>y</sub>**,  
235 **d<sub>y</sub>**, and **i<sub>y</sub>** when all years were used in the estimation.

#### 236 *Model validation*

237 Five-fold cross validation was used where the data set was randomly divided into 5 equal-sized parts  
238 (“folds”), a single fold (20% of the individuals) was removed across all years, and the remaining  
239 observations were used for variance component estimation and prediction of genetic values. The  
240 resultant model was used to predict genetic values of those removed individuals. This process was  
241 repeated for all 5 folds. Observations lacking phenotypic information for a specific year and trait were  
242 excluded from the model-building and validation. Because predictions can be affected by sampling  
243 variance, 5-fold cross validation was repeated 25 times using different randomly generated folds for each  
244 iteration. In addition, cross validation was performed, omitting each of the 66 full-sib families or a year as  
245 validation populations. These latter situations were intended to reflect the situation of predicting genetic  
246 performance for previously unphenotyped individuals that are related to the training population, and for  
247 predicting performance for an unobserved year. Prediction accuracy was assessed by computing  
248 correlation coefficients between predicted genetic values and observed data adjusted for fixed effects.

#### 249 *Other statistics*

250 The statistical significance of year on the models was checked with the Wald test. Genetic-by-year effects  
251 were further explored by estimating genetic values and genetic variance components using a single year  
252 of data. Spearman’s rank-order correlations were conducted to evaluate changes in rank of genetic  
253 values of individuals across years. Pairwise Pearson (*r*) and Spearman (*ρ*) correlations between traits  
254 were assessed for the multi-year ADI model. Principal component analyses were conducted on  
255 correlation matrix of genetic values calculated from (1) all individuals used in this study, and (2) only the  
256 cultivars and ancestors (*n*=48), using 8 independent traits: bloom time, harvest time, pedicel-fruit retention  
257 force, fruit weight, firmness, SSC, TA, and powdery mildew incidence. The first and second principal  
258 components were graphed on a biplot [63], where the rotations for plotting the variables were scaled by  
259 the first eigenvalue.

260

261

## 262 **RESULTS**

### 263 *Distribution of phenotypic data*

264 All trait distributions (consisting of 600-755 data points for each trait) were influenced by the year of data  
265 collection (Fig. 1). Wald test results for year were consistently highly significant for all focus traits across  
266 all models ( $p < 0.001$  in all cases).

267 The 2010 data visually differed most from the other years, particularly for bloom date, fruit  
268 dimensions, fruit weight, firmness, and SSC. Data in 2010 were also the most sparse compared to data  
269 from other years (Additional File 2). Fruit dimensions and fruit weight had similar distributions across  
270 years. Although the distributions of bloom date and bloom time seemed to differ, the accumulation of  
271 GDD remained relatively stable over the three years. However, GDD accumulation was higher in early  
272 2010 than other years during the critical period of flower bloom (data not shown).

### 273 *Statistical assumptions and model fit*

274 All models for the focus traits converged. Inspection of the residual plots and quantile-quantile plots signal  
275 that the error terms were independently and identically distributed (results not shown). The extended hat  
276 matrix revealed no influential data points for any of the models. Appropriate residual patterns were  
277 observed for all models and traits (results not shown), demonstrating no major departures from the  
278 assumption of homoscedasticity. Moderate correlations were observed between the additive, dominance  
279 and epistatic effects within a trait for the full model ( $r = 0.3 - 0.7$ ). Population structure was observed  
280 among the individuals. In a principal component analysis of the correlation matrix of the SNP data, the  
281 first two components summarized 14% of the variation. There was distinct grouping of the wild accessions  
282 and offspring derived from those wild accessions along the second principal component (data not shown).  
283 Visual inspection of the diagonals and off-diagonals from the realized relationship implies a single  
284 Gaussian distribution of the matrix elements. Thus, the population structure had minimal impact on the  
285 genomic additive relationship matrix (Additional File 3).

286 Log likelihood ratio tests comparing reduced models with the full ADI model demonstrated that  
287 the full model was not necessary to describe trait variance for any focus trait (Table 1). The main effects-  
288 only model that included only additive, dominance, and epistatic effects was significantly different from

289 the full model (p-values <0.05) for all focus traits, except for powdery mildew incidence and SSC, which  
290 had notable p-values defined as less than 0.10. Reduced models consisting of single main effects  
291 (additive, dominance or epistatic) or single main effects plus their year interaction term (e.g., additive and  
292 additive-by-year) were highly significant for all traits. This demonstrates that the reduced models did not  
293 adequately capture variation compared to the full model. For most focus traits, genetic models that  
294 included additive, epistatic, additive-by-year and epistasis-by-year effects were not statistically different  
295 from the full model. Thus, dominance and dominance-by-year could be dropped from their genetic models  
296 without significant loss of information. Traits that were exceptions to the above were fruit weight, fruit  
297 dimensions, and bloom date, for which optimal fit was obtained by including dominance in the model. For  
298 all traits, dominance-by-year and epistasis-by-year effects could be removed from the model without  
299 much loss of information. Additive-by-year effects had a statistically significant effect on bloom date,  
300 bloom time, and PFRF ( $p < 0.01$ ).

301 **Table 1:** Log-Likelihood ratio test statistics for reduced models.

| Model                                                       | df | Bloom Date | Bloom Time | Harvest Date | Harvest Time | PFRF     | Fruit Dimensions | Fruit Weight | Firmness  | SSC      | TA       | Powdery Mildew |
|-------------------------------------------------------------|----|------------|------------|--------------|--------------|----------|------------------|--------------|-----------|----------|----------|----------------|
| <b>a, d, i, a<sub>Y</sub>, d<sub>Y</sub>, i<sub>Y</sub></b> | 1  | 0.08       | 0.46       | 3.43*        | 0.28         | 0.09     | 2.48‡            | 0.11         | 0.07      | 0.00     | 4.82*    | 0.62           |
| <b>a, d, i, a<sub>Y</sub>, d<sub>Y</sub>, i<sub>Y</sub></b> | 1  | 4.92*      | 0.00       | 0.00         | 0.00         | 0.00     | 0.00             | 0.08         | 0.00      | 0.00     | 0.00     | 0.70           |
| <b>a, d, i, a<sub>Y</sub>, d<sub>Y</sub>, i<sub>Y</sub></b> | 1  | 9.80***    | 7.80**     | 0.58         | 3.36*        | 6.57**   | 1.23             | 1.24         | 4.80*     | 2.94*    | 0.94     | 0.35           |
| <b>a, d, i, a<sub>Y</sub>, d<sub>Y</sub>, i<sub>Y</sub></b> | 2  | 8.02**     | 16.18***   | 66.80***     | 64.86***     | 6.48*    | 6.78*            | 6.12*        | 65.72***  | 16.35*** | 27.20*** | 24.11***       |
| <b>a, d, i, a<sub>Y</sub>, d<sub>Y</sub>, i<sub>Y</sub></b> | 2  | 8.15**     | 2.18       | 3.67‡        | 3.27‡        | 3.01‡    | 27.26***         | 28.59**      | 0.10      | 0.00     | 0.00     | 0.70           |
| <b>a, d, i, a<sub>Y</sub>, d<sub>Y</sub>, i<sub>Y</sub></b> | 2  | 38.47***   | 27.03***   | 21.42***     | 26.17***     | 18.28*** | 36.39***         | 23.16***     | 20.15***  | 17.33*** | 16.92*** | 13.67***       |
| <b>a, d, i, a<sub>Y</sub>, d<sub>Y</sub>, i<sub>Y</sub></b> | 4  | 44.16***   | 38.83***   | 151.67***    | 148.47***    | 28.3***  | 60.34***         | 88.48***     | 93.05***  | 17.86*** | 32.11*** | 63.25***       |
| <b>a, d, i, a<sub>Y</sub>, d<sub>Y</sub>, i<sub>Y</sub></b> | 4  | 69.96***   | 70.76***   | 114.46***    | 112.39***    | 33.86*** | 66.94***         | 40.09***     | 109.78*** | 45.02*** | 63.2***  | 43.75***       |
| <b>a, d, i, a<sub>Y</sub>, d<sub>Y</sub>, i<sub>Y</sub></b> | 4  | 65.60***   | 41.18***   | 66.61***     | 73.36***     | 45.52*** | 143.04***        | 132.90***    | 47.06***  | 28.43*** | 21.12*** | 33.52***       |
| <b>a, d, i, a<sub>Y</sub>, d<sub>Y</sub>, i<sub>Y</sub></b> | 3  | 55.39***   | 27.71***   | 9.86**       | 7.55*        | 20.12*** | 14.62***         | 6.66*        | 25.72***  | 5.10‡    | 12.73**  | 4.93‡          |
| <b>a, d, i, a<sub>Y</sub>, d<sub>Y</sub>, i<sub>Y</sub></b> | 5  | 76.22***   | 53.20***   | 151.67***    | 148.47***    | 41.51*** | 63.50***         | 88.83***     | 101.90*** | 20.63*** | 33.93*** | 63.25***       |
| <b>a, d, i, a<sub>Y</sub>, d<sub>Y</sub>, i<sub>Y</sub></b> | 5  | 105.34***  | 75.84***   | 114.46***    | 112.39***    | 39.95*** | 71.64***         | 42.22***     | 116.05*** | 45.32*** | 63.59*** | 44.52***       |
| <b>a, d, i, a<sub>Y</sub>, d<sub>Y</sub>, i<sub>Y</sub></b> | 5  | 106.64***  | 65.35***   | 79.69***     | 80.30***     | 62.65*** | 159.6***         | 139.02***    | 62.46***  | 32.09*** | 35.70*** | 38.6***        |

302 Log-likelihoods are expressed relative to the full model (**a, d, i, a<sub>Y</sub>, d<sub>Y</sub>, i<sub>Y</sub>**). Statistical significance is labeled as ‡ =  $p < 0.10$ , \* =  $p < 0.05$ , \*\* =  $p <$   
 303  $0.01$ , \*\*\* =  $p < 0.001$ , marking if the reduced model is statistically different from the full model using the chi-square distribution (df = degrees of  
 304 freedom). The terms in the models, **a, d, i** refer to effects from additive, dominance, and epistatic sources, respectively. The terms **a<sub>Y</sub>, d<sub>Y</sub>, i<sub>Y</sub>** refer  
 305 to additive-by-year, dominance-by-year, and epistasis-by-year effects, respectively. The bolded terms in the column “Model” indicate components  
 306 included in the reduced model, while grey terms have been excluded.

307 *Genetic variance and predictive ability of full model*

308 Variance component estimates from the full model indicated moderate to high broad-sense heritabilities  
309 across the focus traits, ranging from 0.47 for pedicel-fruit retention force to 0.83 for harvest date (Table  
310 2). Narrow-sense heritabilities ranged from 0.20 for PFRF to 0.37 for fruit dimensions. Epistasis was the  
311 single largest genetic variance component for most traits: bloom time (28%), harvest date (48%), harvest  
312 time (48%), firmness (49%), SSC (27%), TA (33%), and powdery mildew incidence (42%). Additive  
313 variance was the largest component for bloom date (37%), PFRF (20%), and fruit dimensions (37%).  
314 Dominance was the largest variance component only for fruit weight (34%); in contrast, dominance  
315 represented less than 1% of trait variance for firmness, SSC, TA, and powdery mildew incidence.  
316 Genotype-by-year effects were less than 10% for all traits except bloom date ( $\mathbf{a}_Y = 11\%$ ) and TA ( $\mathbf{i}_Y =$   
317 14%). Residual variance of most traits was less than 25% of phenotypic variance, except for PFRF (45%)  
318 and SSC (48%). Variances and standard errors for all components and traits, and variance percentages,  
319 are provided in Additional Files 4 and 5, respectively.

320 **Table 2:** Variance components (%), narrow-sense heritability ( $h^2$ ), broad-sense heritability ( $H^2$ ), the coefficient of correlation ( $r$ ), the coefficient  
 321 of correlation after cross validation ( $r_{CV}$ ), and the total number of observations for model building (N).

|                    | Bloom Date                                                       | Bloom Time | Harvest Date | Harvest Time | PFRF  | Fruit Dimensions | Fruit Weight | Firmness | SSC   | TA    | Powdery Mildew |
|--------------------|------------------------------------------------------------------|------------|--------------|--------------|-------|------------------|--------------|----------|-------|-------|----------------|
|                    | variance component (%)                                           |            |              |              |       |                  |              |          |       |       |                |
| additive (A)       | 33.20                                                            | 25.45      | 27.39        | 27.87        | 19.83 | 37.40            | 30.76        | 27.49    | 21.59 | 27.19 | 28.31          |
| dominance (D)      | 10.80                                                            | 11.48      | 7.73         | 6.68         | 11.10 | 26.80            | 33.61        | 0.42     | 0.00  | 0.00  | 0.00           |
| epistasis (I)      | 17.47                                                            | 27.84      | 47.66        | 47.90        | 15.62 | 8.36             | 12.08        | 48.96    | 26.76 | 32.81 | 41.52          |
| A x Year           | 11.16                                                            | 8.10       | 1.18         | 2.89         | 6.30  | 2.98             | 2.26         | 4.57     | 4.08  | 3.42  | 1.57           |
| D x Year           | 4.23                                                             | 0.00       | 0.00         | 0.00         | 0.00  | 0.00             | 0.52         | 0.00     | 0.00  | 0.00  | 1.19           |
| I x Year           | 2.06                                                             | 3.63       | 5.71         | 1.65         | 2.31  | 8.03             | 1.14         | 0.94     | 0.00  | 14.15 | 4.33           |
| error              | 21.08                                                            | 23.48      | 10.33        | 13.02        | 44.84 | 16.42            | 19.62        | 17.62    | 47.56 | 22.43 | 23.07          |
|                    | trait heritability and genome-estimated breeding values accuracy |            |              |              |       |                  |              |          |       |       |                |
| $h^2$              | 0.33                                                             | 0.25       | 0.27         | 0.28         | 0.20  | 0.37             | 0.31         | 0.27     | 0.22  | 0.27  | 0.28           |
| $H^2$              | 0.61                                                             | 0.65       | 0.83         | 0.82         | 0.47  | 0.73             | 0.76         | 0.77     | 0.48  | 0.60  | 0.70           |
| $r$                | 0.88                                                             | 0.90       | 0.97         | 0.97         | 0.83  | 0.94             | 0.95         | 0.94     | 0.82  | 0.88  | 0.93           |
| $r_{CV}$ , 5-fold  | 0.56                                                             | 0.48       | 0.78         | 0.79         | 0.59  | 0.78             | 0.77         | 0.69     | 0.46  | 0.42  | 0.68           |
| $r_{CV}$ , -year   | 0.58                                                             | 0.48       | 0.88         | 0.88         | 0.58  | 0.82             | 0.83         | 0.76     | 0.47  | 0.50  | 0.74           |
| $r_{CV}$ , -family | 0.55                                                             | 0.46       | 0.74         | 0.74         | 0.55  | 0.76             | 0.70         | 0.66     | 0.38  | 0.31  | 0.58           |
| N                  | 644                                                              | 644        | 665          | 665          | 759   | 774              | 764          | 763      | 768   | 577   | 604            |

322 Correlations between adjusted phenotypic data and genetic values from the ADI model were high, 0.82-  
323 0.97 for all focus traits (Table 2). Coefficients of correlation under cross validation were very similar for 5-  
324 fold cross validation and when a year was left out. Correlations for cross validation that omitted full-sib  
325 families were the lowest among the three cross validation scenarios. Across all cross-validation  
326 scenarios, those traits with the highest broad-sense heritabilities, fruit dimensions, fruit weight, firmness,  
327 harvest date, and harvest time, had the most consistently high prediction accuracies ( $r > 0.65$ ). The  
328 lowest prediction accuracies were observed for SSC and TA, which never exceeded 0.50.

### 329 *Heritability and predictive ability of reduced models*

330 Broad-sense heritability was largely unchanged across the reduced models (ADI to AI and AD) for all  
331 focus traits (Fig. 2). Narrow-sense heritability gradually increased with decreasing model complexity for all  
332 focus traits, from the full model to the AD model and from the AD to the A model. Narrow-sense  
333 heritability was highly similar in the AI and ADI models for all traits except for fruit dimensions and fruit  
334 weight, in which the AI  $h^2$  was noticeably higher in the AI model compared to the ADI and AD models  
335 (Fig. 2). In the additive effects-only model (A),  $H^2$  was similar in value to the  $h^2$  of the other models.

336 Predictive power, as measured by  $r^2$ , was consistent between the ADI model and the AI model for  
337 all traits (Fig. 2). The predictive power decreased slightly for the AD model compared to the full model,  
338 and decreased slightly more for the A model compared to the AD model. The  $r^2$  values under 5-fold cross  
339 validation varied little across genetic models for all traits, only decreasing slightly in the AD and A reduced  
340 models for harvest date, harvest time, and firmness. Spearman rank correlations between the full and  
341 reduced models indicated minimal changes in rankings of individuals when using the AD and AI models ( $r$   
342 = 0.96–1.00) and small changes in the A model compared to ADI model ( $r = 0.91–0.96$ ) for genetic values  
343 and breeding values (Additional File 2).

### 344 *Single year analysis*

345 Variance components estimated with a single year of data varied substantially across years for all focus  
346 traits (Fig. 3). For all traits except harvest date and harvest time, the percentages of additive variance  
347 differed by 10% or more across years. Additive variance for harvest date and harvest time varied the least  
348 among the focus traits, 37 to 44% and 37 to 47%, respectively. Dominance variance components for SSC  
349 and TA were close to zero (<0.0001%) across all years, while at the other extreme, dominance variation



350 for fruit dimensions was always greater than 20%. Epistatic variance consistently composed a large  
351 percentage of genetic variance for firmness (>32%) and powdery mildew incidence (>49%). Genotype-by-  
352 year effects were greatest for TA (18%), bloom date (18%), and bloom time (12%).

353 Rankings of individuals by genetic values estimated from each a single year of data significantly  
354 differed from the multi-year genetic rankings in Spearman rank correlation tests ( $p < 0.001$ , Additional File  
355 2). Rank correlations between the 2010-derived predictions and the multi-year predictions were lower  
356 than the subsequent years (2010: 0.35–0.63; 2011: 0.58–0.92; 2012: 0.85–0.97). However, correlations  
357 between single-year breeding values and phenotype implied a better fit for all years and traits than the  
358 single-year breeding values with their multi-year counterparts ( $\rho = 0.64–1.00$ ) (Additional File 2).

### 359 *Correlations among trait genetic values*

360 The genetic values of the focus traits had weak to moderate positive correlations with each when  
361 considering only unreleased offspring and selection, with some exceptions (Table 3). Fruit weight and fruit  
362 dimensions, harvest date and harvest time, and bloom date and bloom time were all highly correlated  
363 pairs of traits ( $r > 0.90$ , Table 3). SSC was negatively correlated with all focus traits except TA. Titratable  
364 acidity was also negatively correlated with fruit dimensions, fruit weight and powdery mildew incidence. In  
365 a biplot of the correlation matrix of the named cultivars using eight independent traits, the first two  
366 principal components summarized 55% of the variance (Fig. 4). All variables but SSC and TA skewed to  
367 the left, corresponding to the negative correlations between SSC and all variables except TA. Wild  
368 ancestors and wild offspring were on the right side of the biplot corresponding to their high SSC, low  
369 powdery mildew incidence, and low fruit weight. Additional figure 6 further separates the sweet cherry  
370 founders and derived cultivars by fruit weight and SSC content.

371 **Table 3:** Pairwise trait correlations and covariances between genetic values for sweet cherry selections and unselected offspring.

|                  | Bloom Date   | Bloom Time   | Harvest Date | Harvest Time | PFRF         | Fruit Dimensions | Fruit Weight | Firmness    | SSC          | TA              | Powdery Mildew |
|------------------|--------------|--------------|--------------|--------------|--------------|------------------|--------------|-------------|--------------|-----------------|----------------|
| Bloom Date       | <b>3.507</b> | 0.897***     | 0.317***     | 0.314***     | 0.301***     | 0.136*           | 0.196***     | 0.223***    | -0.101       | 0.133*          | 0.184**        |
| Bloom Time       | 18.17        | <b>117.1</b> | 0.213***     | 0.208***     | 0.198***     | 0.087            | 0.130*       | 0.134‡      | -0.071       | 0.064           | 0.218***       |
| Harvest Date     | 3.446        | 13.38        | <b>33.72</b> | 0.998***     | 0.255***     | 0.340***         | 0.346***     | 0.547***    | -0.364***    | 0.107           | 0.220***       |
| Harvest Time     | 50.93        | 195.4        | 502.2        | <b>7508</b>  | 0.251***     | 0.334***         | 0.341***     | 0.549***    | -0.355***    | 0.106           | 0.225***       |
| PFRF             | 74.88        | 283.9        | 196.2        | 2883         | <b>17630</b> | 0.566***         | 0.603***     | 0.465***    | -0.161***    | 0.173‡          | 0.185***       |
| Fruit Dimensions | 0.3082       | 1.142        | 2.394        | 35.10        | 91.09        | <b>1.468</b>     | 0.946***     | 0.511***    | -0.507***    | -0.210***       | 0.462***       |
| Fruit Weight     | 0.9209       | 3.695        | 5.042        | 74.33        | 201.1        | 2.880            | <b>6.311</b> | 0.514***    | -0.435***    | -0.208***       | 0.505***       |
| Firmness         | 17.26        | 59.91        | 131.1        | 1964         | 2546         | 25.55            | 53.26        | <b>1702</b> | -0.392***    | 0.065           | 0.387***       |
| SSC              | -0.3403      | -1.387       | -3.793       | -55.10       | -38.44       | -1.101           | -1.958       | -28.99      | <b>3.214</b> | 0.267***        | -0.340***      |
| TA               | 0.02486      | 0.06856      | 0.06204      | 0.9132       | 2.295        | -0.02541         | -0.05219     | 0.2668      | 0.04778      | <b>0.009934</b> | -0.215**       |
| Powdery Mildew   | 0.3509       | 2.409        | 1.304        | 19.91        | 25.11        | 0.5707           | 1.295        | 16.28       | -0.6215      | -0.02181        | <b>1.041</b>   |

372 Correlations and covariances are given in the upper triangle and lower triangle, respectively, and trait variances are bolded on the diagonal.

373 Statistical significance is labeled as ‡ =  $p < 0.10$ , \* =  $p < 0.05$ , \*\* =  $p < 0.01$ , \*\*\* =  $p < 0.001$ , signaling if the correlations are different from zero.

374

375 **DISCUSSION**

376 Results indicated high broad-sense heritability for all of the focus traits and also illuminated the  
377 importance of non-additive variation in the sweet cherry traits studied. A poorly-fitting genetic prediction  
378 model can misrepresent the genetic variances of traits and the potential for genetic gain.

379 *Importance of model fit and consequences for predictive ability*

380 This study demonstrated that for most traits, non-additive sources of variation comprised an equal or  
381 larger portion of the genetic variance than additive variance. A genetic model including additive, epistatic,  
382 additive-by-year and epistasis-by-year effects was usually the most parsimonious approach for capturing  
383 major sources of variation. Exceptions were fruit dimensions and fruit weight, which instead were best  
384 described by a model with additive, dominance and additive-by-year effects, and harvest date, best  
385 described by a main effects-only model.

386         Using an incorrect model to determine genome-wide breeding values can provide misleading  
387 information for making breeding decisions. Table 4 illustrates the consequences of using a poorly-fitting  
388 reduced model for estimating breeding values. Breeding values were often larger in relative magnitude in  
389 the reduced models compared to the full model, which can exaggerate genetic gains possible in the  
390 population. For example, days to maturity in an Ambrunes/Sweetheart cross would be overestimated by  
391 twice as many days in the additive-only model compared to the ADI model. Likewise, crosses with the  
392 wild accession MIM 23 were predicted to result in midparent values of fruit size twice as small in the A  
393 model compared to the ADI model (Table 4). The inflation of additive variance when non-additive sources  
394 are omitted has been documented in several other species including apple, loblolly pine, white spruce  
395 cassava, cattle, pigs, Coho salmon, and rainbow trout [27,45,60,64–68].

396

397 **Table 4:** Breeding values and midparent values under different genetic models demonstrated with several  
 398 individuals and traits.

| Trait                           | Model | Parental values |            |        | Midparent values        |                     |                       |
|---------------------------------|-------|-----------------|------------|--------|-------------------------|---------------------|-----------------------|
|                                 |       | Ambrunes        | Sweetheart | MIM 23 | Ambrunes/<br>Sweetheart | Ambrunes/<br>MIM 23 | Sweetheart/<br>MIM 23 |
| Harvest Date<br>(-15.82, 16.35) | A     | 14.64           | 8.43       | -9.93  | 11.53                   | 2.36                | -0.75                 |
|                                 | AD    | 8.79            | 5.57       | -6.34  | 7.18                    | 1.23                | -0.38                 |
|                                 | AI    | 7.36            | 4.76       | -6.60  | 6.06                    | 0.38                | -0.92                 |
|                                 | ADI   | 6.48            | 4.05       | -5.73  | 5.27                    | 0.38                | -0.84                 |
| Fruit Weight<br>(-11.45, 5.06)  | A     | -1.86           | 1.64       | -10.67 | -0.11                   | -6.26               | -4.51                 |
|                                 | AD    | -0.87           | 0.95       | -4.58  | 0.04                    | -2.73               | -1.82                 |
|                                 | AI    | -2.55           | 1.98       | -8.80  | -0.28                   | -5.67               | -3.41                 |
|                                 | ADI   | -1.11           | 1.06       | -4.72  | -0.03                   | -2.91               | -1.83                 |
| SSC<br>(-3.77, 5.61)            | A     | -1.07           | -1.98      | 3.38   | -1.53                   | 1.15                | 0.70                  |
|                                 | AD    | -0.84           | -2.00      | 2.93   | -1.42                   | 1.05                | 0.47                  |
|                                 | AI    | 0.10            | -1.81      | 2.53   | -0.86                   | 1.31                | 0.36                  |
|                                 | ADI   | 0.10            | -1.83      | 2.48   | -0.86                   | 1.29                | 0.33                  |
| Powdery                         | A     | 0.13            | 1.28       | -2.38  | 0.70                    | -1.13               | -0.55                 |
| Mildew                          | AD    | 0.39            | 0.83       | -1.67  | 0.61                    | -0.64               | -0.42                 |
| Incidence                       | AI    | -0.31           | 0.89       | -1.78  | 0.29                    | -1.05               | -0.45                 |
| (-2.72, 1.99)                   | ADI   | -0.28           | 0.87       | -1.74  | 0.29                    | -1.01               | -0.44                 |

399 Intervals given below each trait are the range of values in the additive-only model observed across all  
 400 individuals. In the column "Model", A, D, and I refer to additive, dominance, and epistatic effects,  
 401 respectively, and their accompanying genotype-by-year interactions.

402  
 403 If genetic values are used to select individuals to be clonally propagated for further trialing or  
 404 cultivar release, then the genetic model has a lower, perhaps negligible, influence on prediction of total  
 405 genetic performance. Ceballos et al [69] argued that using total genetic values from additive and non-  
 406 additive variance components provides greater potential for genetic gain under clonal selection. However,  
 407 our results showed that the estimated broad-sense heritability and the genetic values of sweet cherry  
 408 individuals are largely unchanged across the different genetic models. This demonstrates that there is  
 409 effectively no change in genetic gain if a more complex model is used for identifying high-performing  
 410 individuals (Figure 2, Additional File 2).

411 Including year as a main effect was warranted in this study, given the statistically significant effect  
 412 of year on all traits. However, the effect of including genotype-by-year interactions varied by the trait and  
 413 genetic variance component. Genotype-by-year interactions were generally of much smaller magnitude  
 414 than the main genetics effects and largely absent for dominance effects (Table 1, Fig. 3). Nevertheless,  
 415 year had a major effect on genetic effects estimates and was included as a fixed variable to obtain robust  
 416 predictions across years. Year often has a statistically significant effect on the traits of sweet cherry and

417 other rosaceous crops, including sweet cherry pedicel-fruit retention force [70], apple fruit texture [71],  
418 sugar content in peach and nectarine [72], and several phenological and fruit quality traits in strawberry  
419 [73].

420 This study demonstrated the need for a training population to fully capture variation of the target  
421 population in order to maximize prediction accuracy. The single year analysis showed that although a  
422 model built using a single year of data could be used accurately to predict individuals evaluated in that  
423 year, it could not be easily extrapolated to individuals whose genetic values lie outside the distribution of  
424 the training data (Table 2, Additional File 2). The GBLUP approach relies on information from relatives to  
425 improve the accuracy of the estimates [74]. Because there were often sparse observations for a single  
426 year, sampling error biased the single-year estimates and resulted in models that fit the data within each  
427 year, but not across years. These effects were likely exacerbated with wild accession, distantly related  
428 cultivars and derivatives from both groups. However, the true pairwise genetic covariance between the  
429 distantly related germplasm is estimated with less reliability with the realized relationship matrix than more  
430 closely related germplasm [75].

#### 431 *Genetic architecture of focus traits in sweet cherry*

432 This study confirmed the extensive opportunity in North American sweet cherry germplasm for genetic  
433 improvement of the phenological traits of harvest timing and, to lesser extent, bloom timing. Previous QTL  
434 studies for fruit maturity date across several *Prunus* species determined bloom timing and harvest timing  
435 to be highly heritable with a large-effect QTL on LG4 [76]. Our findings also demonstrate the large broad-  
436 sense heritability for these traits – reaching a ceiling of 0.83 for harvest time and 0.65 for bloom date (Fig.  
437 2). There appears to be little advantage to using GDD to Julian days, since pairs of phenological traits for  
438 bloom and harvest timing displayed highly similar genetic architecture and predictive accuracy. The data  
439 were all gathered from a single location, in which GDD did not vary dramatically during the years of  
440 evaluation. This may explain why GDD did not improve the model predictive ability over Julian days (Fig  
441 2, Table 2). Bloom timing has become increasingly important as a trait relevant to productivity, since  
442 variable climatic patterns in temperate regions can result in earlier flowering and an increased risk of floral  
443 freeze damage [77]. Furthermore, since sweet cherries are a fresh market product that is subject to rapid  
444 postharvest deterioration, it is crucial to for sweet cherry breeders and producers to understand the

445 expected time frame for fruit maturation [76]. These results may help sweet cherry breeders identify the  
446 best parents in order to target a harvest timing window.

447 Moderate prospects were observed for genetic improvement of pedicel-fruit retention force ( $h^2 =$   
448  $0.20$ ,  $H^2 = 0.46$ , Table 2), where a low PFRF value is sought for mechanical harvest systems. Positive  
449 correlations observed between PFRF and fruit dimensions, fruit weight, and firmness (Table 3) contrasted  
450 with findings by Zhao et al. [70], in which PFRF was largely uncorrelated with firmness, fruit diameter, or  
451 fruit length. However, that study was smaller in scope, using only 30 named cultivars and 26 unselected  
452 F1 progeny.

453 The potential for genetic gain in fruit dimensions and fruit weight, two highly correlated  
454 measurements of fruit size, was perhaps the highest among all focus traits due to large additive and  
455 dominance effects (Table 2). These results are consistent with previous sweet cherry studies that showed  
456 high correlations between fruit size measurements and high  $H^2$  [18,78–80]. In those studies, six putative  
457 QTLs influencing fruit size in cherry were identified and together accounted for 76–88% of the phenotypic  
458 variance. Because fruit weight was highly correlated with fruit dimensions in the present study (Table 3,  
459 Fig. 4) and can be evaluated rapidly, we considered it an effective proxy for fruit dimensions and general  
460 fruit size.

461 The high broad-sense heritability for firmness (0.77) (Table 2) was consistent with estimates from  
462 a study conducted on a biparental population in which  $H^2$  was estimated at 0.78 to 0.85 [80]. In our study,  
463 the moderate positive correlations ( $r = 0.51$ ) between fruit firmness and fruit dimensions among the  
464 unreleased progeny suggests genetic linkage among loci influencing these traits. This outcome was in  
465 contrast to that of a multi-year QTL study, in which the Pearson correlations between fruit firmness and  
466 fruit weight ranged from -0.64 to -0.67 for Regina × Lapins and -0.40 to -0.15 for Regina × Garnet F1  
467 families [80]. Those correlations are likely due to unique linkage in Regina, Garnet and Lapins. The  
468 correlations reported here may have also been influenced by the 77 progeny derived from the three wild  
469 parents: MIM 17, MIM 23, and NY54. These individuals all had high SSC, small fruit size, and low fruit  
470 firmness in their estimated genetic values relative to the population mean (Additional File 7).

471 Expectations for genetic improvement in SSC were moderately positive. Narrow-sense heritability  
472 was estimated at 0.22, typical of the other focus traits in this study, where  $h^2$  was most often between 0.2

473 and 0.3 (Table 2). Broad-sense heritability of SSC ( $H^2 = 0.48$ ) was similar to that of other stone fruit:  
474 approximately 0.50 for apricot [81], 0.72 for peach [82], and 0.49 to 0.55 for apple [33]. Previous results  
475 confirm SSC had moderately negative correlation with fruit dimensions and fruit weight (-0.55 and -0.48,  
476 respectively). Our results are consistent with previous research, suggesting that SSC is directly related to  
477 photoassimilate partitioning and hence inversely correlated with fruit size [83,84]. Titratable acidity, the  
478 second most important contributor to fruit flavor after SSC, had similar variance component proportions  
479 and predictive accuracy to SSC. Major QTLs for TA have been detected on linkage groups 1, 5, and 6,  
480 explaining 99% of phenotypic variation in an F1 biparental peach population that was segregating for a  
481 large-effect locus [85]. These QTLs have not been reported in cherry. The broad-sense heritability of  
482 sweet cherry TA was lower in this study at  $H^2 = 0.60$  and  $h^2 = 0.27$ . However, the population used in  
483 Dirlewanger et al [85] was created expressly to detect QTLs associated with TA, which might explain its  
484 very high  $H^2$ .

485         The large  $H^2$  and  $h^2$  estimated for foliar powdery mildew incidence indicated excellent potential for  
486 genetic improvement, but the lack of genome-wide dominance effects was surprising (Table 2). Powdery  
487 mildew resistance in U.S. sweet cherry germplasm was first traced to a single dominant allele in the  
488 ancestor PMR-1 [86,87]. There may be evidence for other sources of powdery mildew resistance among  
489 Pacific Northwest-adapted germplasm (Zhao et al, *In Prep*). Haploblock analysis might be required to  
490 detect dominance effects, which appeared to be absorbed by the other relationship matrices. The large  
491 epistatic component (42%) determined for this trait in sweet cherry was consistent with resistance to other  
492 plant diseases such as soybean sudden death disease (causative agent *Fusarium virguliforme*) and  
493 rice to rice blast disease (*Pyricularia oryzae*) [88–90].

#### 494 *Implications for sweet cherry genetic improvement*

495         The improvement in prediction accuracy when incorporating epistasis into the genetic model is  
496 consistent with studies on apple, Eucalyptus, wheat, cassava and maize [45,68,91–96]. Additive by  
497 additive epistasis is difficult to untangle from additive main effects due to selection, assortative mating  
498 and nongenetic covariances [44], all common facets of many breeding programs. The genomic  
499 relationship matrix for epistasis used here is considered to be an approximation since the assumption of  
500 random mating is not met [60,97]. The additive and dominance genomic relationship matrices used in this

501 study were not necessarily orthogonal due to linkage disequilibrium between SNPs [27], and the modest  
502 correlations between the additive dominance, and epistatic values were evidence of covariance between  
503 the different genetic effects.

504 Epistasis has not typically been targeted for parental selection in genetic improvement programs,  
505 although it can be captured indirectly with additive effects if epistatic alleles are fixed through inbreeding  
506 or drift [68,98]. Allele fixation is challenging in predominantly heterozygous crop such as sweet cherry  
507 whose high heterozygosity is maintained by a self-incompatibility mechanism [99]. However, knowledge  
508 of allele phasing, a feature of the RosBREED sweet cherry Crop Reference Set, could enable the capture  
509 of valuable epistatic interactions through known allelic interactions for both clonal performance and  
510 breeding parent utility.

511 Distributions of genome-estimated breeding values from the ADI model (Additional File 7) reveals  
512 a broad base of genetic diversity and opportunity for cherry improvement. This study confirmed that the  
513 cultivar Moreau has lowest breeding values for harvest date, denoting earliness. Early Burlat and several  
514 unreleased offspring mature several days after Moreau. The highest breeding values for harvest date,  
515 designating late-season maturation, included many unreleased offspring with higher breeding values than  
516 the highest-value cultivar (Ambrunes), particularly among the families Fam35 and Fam30 that might be  
517 useful as parents. There are also many unreleased offspring with desirable breeding values for certain  
518 traits. Families Fam1 and Fam21 have high breeding values for SSC and TA. Families Fam35 and  
519 Fam16 have high fruit weight and firmness breeding values, in addition to the cultivars Cowiche,  
520 Sweetheart and Selah. The breeding values reported here will enable breeders to identify valuable  
521 parents earlier in the breeding program than through phenotyping alone. Identification of parents earlier in  
522 a breeding program is a major application of genomic selection [100] and has been widely used for many  
523 crops including long-lived perennial trees [40,45,67,101–103].

524 Using genomic selection to skip a breeding phase has also been proposed or implemented in  
525 several crops including apple, loblolly pine, Eucalyptus and several self-pollinated and hybrid crops  
526 [29,102,104–107]. The genetic values among unreleased progeny and selections described here  
527 revealed several promising individuals with commercial potential (Additional File 7, results not shown for  
528 selections). Because sweet cherry maintains the same genetic composition and genetic potential through



529 the breeding phases, genetic values obtained early in the breeding process will not change due to  
530 recombination. Knowing the genetic potential of an individual will help cherry breeders discard low-  
531 performing individuals and advance selections to the next phase with strong evidence. Knowledge of the  
532 genetic potential of a candidate selection may enable breeders to skip a cycle of field evaluation, thus  
533 increasing the pace of cultivar release and saving resources that can be diverted elsewhere. Given the  
534 lengthy time period for developing a sweet cherry cultivar, shortening this process may represent  
535 considerable savings.

## 536 **CONCLUSIONS**

537 The genetic values and the improved understanding of the genetic architecture of important traits  
538 in sweet cherry obtained from this multi-year data set of a large pedigree-connected population represent  
539 a clear opportunity for genetic improvement. This application – estimating genetic variance components  
540 and genome-enabled genetic values – extended the original purpose of the RosBREED sweet cherry  
541 Crop Reference Set: QTL detection and validation. We plan to update the genetic models by  
542 incorporating new phenotypic data on the existing germplasm, adding new individuals and expanding the  
543 genome-wide SNP set for denser genome coverage. Further research is needed to validate the accuracy  
544 of the genetic predictions on an independent data set and to understand the extent of genotype-by-  
545 environment effects for the obtained breeding values and genetic values.

## 546 **DECLARATIONS**

547 *Ethics approval and consent to participate*

548 Not applicable.

549 *Consent for publication*

550 Not applicable.

551 *Availability of data and material*

552 All data used in the analyses are available at the Genome Database for Rosaceae at [www.rosaceae.org](http://www.rosaceae.org)

553 [108] (persistent web link available upon article acceptance).

554 *Competing interests*

555 The authors declare no competing interests.

556 *Funding*

557 RosBREED: Combining disease resistance with horticultural quality in new rosaceous cultivars, provided  
558 by the USDA-NIFA Specialty Crop Research Initiative (2014-51181-22378)

559 *Authors' contributions*

560 Julia Piaskowski was responsible for the bulk of the data analysis and interpretation. Craig Hardner  
561 advised on model building interpretation. Lichun Cai prepared the SNP data and Yungyang Zhao  
562 gathered phenotypic data. Amy lezzoni and Cameron Peace contributed to study design and  
563 interpretation. All authors contributed to manuscript preparation.

564 *Acknowledgements*

565 We gratefully acknowledge our funding source, RosBREED: Combining disease resistance with  
566 horticultural quality in new rosaceous cultivars, provided by the USDA-NIFA Specialty Crop Research  
567 Initiative (2014-51181-22378). We also gratefully acknowledge the contributions of an anonymous  
568 reviewer via the Peerage of Science review process, and Laura Giradeau for manuscript editing.

569 **ADDITIONAL FILES**

570 Seven supplementary materials accompany this manuscript: Additional File 1 includes germplasm  
571 information on all individuals included in the study; Additional File 2 lists Spearman rank correlations by  
572 year and model and the number of observations for each year; Additional File 3 is the additive  
573 relationship matrix diagonals and off-diagonals, labeled by relationship to wild germplasm; Additional File  
574 4 lists all variances and standard errors for all traits whose models converged; Additional File 5 lists  
575 percent variance for all components and heritability for all traits whose models converged; Additional File  
576 6 is a biplot of the cultivars and ancestors; Additional File 7 lists breeding values, dominance values and  
577 genetic values for all individuals except selections and all traits whose models converged. An online app  
578 for exploring the breeding and genetic values presented in Additional File 7 is available at  
579 <[https://jpiaskowski.shinyapps.io/cherry\\_gebv\\_xplorr/](https://jpiaskowski.shinyapps.io/cherry_gebv_xplorr/)>.

580

581 **REFERENCES**

- 582 1. FAOSTAT Data [Internet]. FAOSTAT. [cited 2017 Sep 10]. Available from:  
583 <http://www.fao.org/faostat/en/#data>
- 584 2. National Statistics for Cherry [Internet]. NASS. [cited 2017 Sep 10]. Available from:  
585 [https://quickstats.nass.usda.gov/results/A8988197-374E-3950-BA97-9CBECA511544?pivot=short\\_desc](https://quickstats.nass.usda.gov/results/A8988197-374E-3950-BA97-9CBECA511544?pivot=short_desc)
- 586 3. Sweet Cherry Production Up 36 Percent [Internet]. NASS. [cited 2017 Sep 10]. Available from:  
587 [https://www.nass.usda.gov/Statistics\\_by\\_State/Washington/Publications/Fruit/2017/CH06.pdf](https://www.nass.usda.gov/Statistics_by_State/Washington/Publications/Fruit/2017/CH06.pdf)
- 588 4. Yue C, Gallardo RK, Luby JJ, Rihn AL, McFerson JR, McCracken V, et al. An evaluation of U.S. tart  
589 and sweet cherry producers trait prioritization: evidence from audience surveys. *HortScience*.  
590 2014;49:931–7.
- 591 5. Zheng X, Yue C, Gallardo K, McCracken V, Luby J, McFerson J. What attributes are consumers  
592 looking for in sweet cherries? Evidence from choice experiments. *Agric. Resour. Econ. Rev.*  
593 2016;45:124–42.
- 594 6. Miller D, Casavant K, Buteau J. An analysis of Japanese consumer preferences for Pacific Northwest  
595 and Japanese sweet cherries. 1986. Report No.: XB0974.
- 596 7. Crisosto CH, Crisosto GM, Metheney P. Consumer acceptance of ‘Brooks’ and ‘Bing’ cherries is mainly  
597 dependent on fruit SSC and visual skin color. *Postharvest Biol. Technol.* 2003;28:159–67.
- 598 8. Hu Y. Sensory influences on consumers’ willingness to pay: the apple and cherry markets [Doctoral  
599 Dissertation]. [Pullman, WA]: Washington State University; 2007.
- 600 9. Gallardo RK, Li H, McCracken V, Yue C, Luby J, McFerson JR. Market intermediaries’ willingness to  
601 pay for apple, peach, cherry, and strawberry quality attributes. *Agribusiness*. 2015;31:259–80.
- 602 10. Gallardo RK, Li H, Yue C, Luby J, McFerson JR, McCracken V. Market intermediaries’ ratings of  
603 importance for Rosaceous fruits’ quality attributes. *Int. Food Agribus. Manag. Rev.* 2015;18:121–54.
- 604 11. Sweet Cherries Grades and Standards [Internet]. USDA Agric. Mark. Serv. [cited 2017 Feb 1].  
605 Available from: <https://www.ams.usda.gov/grades-standards/sweet-cherries-grades-and-standards>
- 606 12. Olmstead JW, Ophardt DR, Lang GA. Sweet cherry breeding at Washington State University. *Acta*  
607 *Hortic.* 2000;103–10.
- 608 13. Oraguzie NC, Watkins CS, Chavoshi MS, Peace C. Emergence of the Pacific Northwest sweet cherry  
609 breeding program. *Acta Hortic.* 2017;73–8.
- 610 14. Haldar S, Haendiges S, Edge-Garza D, Oraguzie N, Olmstead J, Peace C. Applying genetic markers  
611 for self-compatibility in the WSU sweet cherry breeding program. *ISHS Acta Hortic.* [Internet]. 2009;859.  
612 Available from: [http://www.actahort.org/books/859/859\\_45.htm](http://www.actahort.org/books/859/859_45.htm)
- 613 15. Sandefur P, Oraguzie N, Peace C. A DNA test for routine prediction in breeding of sweet cherry fruit  
614 color, Pav-R f -SSR. *New Strateg. Plant Improv.* 2016;36:1–11.
- 615 16. Quero-García J, Campoy JA, Castède S, Pitiot C, Barreneche T, Lerigoleur-Balsemin E, et al.  
616 Breeding sweet cherries at INRA-Bordeaux: from conventional techniques to marker-assisted selection.  
617 *Acta Hortic.* 2017;1–14.

- 618 17. Iezzoni A. Variance components and sampling procedures for fruit size and quality in sour cherry.  
619 HortScience. 1986;21:1040–2.
- 620 18. Rosyara U, Bink MAM, van de Weg E, Zhang G, Wang D, Sebolt A, et al. Fruit size QTL identification  
621 and the prediction of parental QTL genotypes and breeding values in multiple pedigreed populations of  
622 sweet cherry. Mol. Breed. 2013;32:875–87.
- 623 19. Srivastava K, Verma M, Ahmad N, Ravi S, Ahmad S. Genetic variability and divergence analysis in  
624 sweet cherry (*Prunus avium* L.). Indian J. Hortic. 2014;71:156–61.
- 625 20. Besford RT, Hand P, Peppitt SD, Richardson CM, Thomas B. Phase Change in *Prunus avium*:  
626 differences between juvenile and mature shoots Identified by 2-dimensional protein separation and *in*  
627 *vitro* translation of mRNA. J. Plant Physiol. 1996;147:534–8.
- 628 21. Henderson CR. Sire evaluation and genetic trends. J. Anim. Sci. 1973;1973:10–41.
- 629 22. Lynch M, Walsh B. Genetic and Analysis of Quantitative Traits. Sunderland, MA: Sinauer Associates,  
630 Inc; 1998.
- 631 23. E Silva FF, Viana JMS, Faria VR, de Resende MDV. Bayesian inference of mixed models in  
632 quantitative genetics of crop species. 2013;126:1749–61.
- 633 24. Henderson CR. Use of relationships among sires to increase accuracy of sire evaluation. J. Dairy Sci.  
634 1975;58:1731–8.
- 635 25. Hayes B, Visscher P, Goddard M. Increased accuracy of artificial selection by using the realized  
636 relationship matrix. Genet. Res. [Internet]. 2009;91. Available from:  
637 <http://dx.doi.org/10.1017/S0016672308009981>
- 638 26. Vitezica ZG, Varona L, Legarra A. On the additive and dominant variance and covariance of  
639 individuals within the genomic selection scope. Genetics. 2013;195:1223–30.
- 640 27. Muñoz PR, Resende MFR, Gezan SA, Resende MDV, de los Campos G, Kirst M, et al. Unraveling  
641 additive from non-additive effects using genomic relationship matrices. Genetics [Internet]. 2014;  
642 Available from: <http://www.genetics.org/content/early/2014/10/15/genetics.114.171322.abstract>
- 643 28. Habier D, Fernando RL, Dekkers JCM. The impact of genetic relationship Information on genome-  
644 assisted breeding values. Genetics. 2007;177:2389–97.
- 645 29. Vela-Avitua S, Meuwissen THE, Luan T, Odegard J. Accuracy of genomic selection for a sib-  
646 evaluated trait using identity-by-state and identity-by-descent relationships. Genet. Sel. Evol. GSE.  
647 2015;47:9.
- 648 30. Junqueira VS, Cardoso FF, Oliveira MM, Sollero BP, Silva FF, Lopes PS. Use of molecular markers  
649 to improve relationship information in the genetic evaluation of beef cattle tick resistance under pedigree-  
650 based models. J. Anim. Breed. Genet. 2017;134:14–26.
- 651 31. Durel CE, Laurens F, Fouillet A, Lespinasse Y. Utilization of pedigree information to estimate genetic  
652 parameters from large unbalanced data sets in apple. Theor. Appl. Genet. 1998;96:1077–85.
- 653 32. de Souza VAB, Byrne DH, Taylor JF. Predicted breeding values for nine plant and fruit characteristics  
654 of 28 peach genotypes. J. Am. Soc. Hortic. Sci. 2000;125:460–5.

- 655 33. Kouassi A, Durel C-E, Costa F, Tartarini S, van de Weg E, Evans K, et al. Estimation of genetic  
656 parameters and prediction of breeding values for apple fruit-quality traits using pedigreed plant material in  
657 Europe. *Tree Genet. Genomes*. 2009;5:659–72.
- 658 34. Stephens MJ, Alspach PA, Beatson RA, Winefield C, Buck EJ. Genetic parameters and breeding for  
659 yield in red raspberry. *J. Am. Soc. Hortic. Sci.* 2012;137:229–35.
- 660 35. Whitaker VM, Osorio LF, Hasing T, Gezan S. Estimation of genetic parameters for 12 fruit and  
661 vegetative traits in the University of Florida strawberry breeding population. *J. Am. Soc. Hortic. Sci.*  
662 2012;137:316–24.
- 663 36. Fresnedo-Ramírez J, Crisosto CH, Gradziel TM, Famula TR. Pedigree correction and estimation of  
664 breeding values for peach genetic improvement. *Acta Hortic.* 2015;249–56.
- 665 37. Gezan SA, Osorio LF, Verma S, Whitaker VM. An experimental validation of genomic selection in  
666 octoploid strawberry. *Hortic. Res.* 2017;4:16070.
- 667 38. Tancred SJ, Zeppa AG, Cooper M, Stringer JK. Heritability and patterns of inheritance of the ripening  
668 date of apples. *HortScience*. 1995;30:325–8.
- 669 39. Hardner CM, Kumar S, Peace CM, Luby J, Evans KM. Reconstructing relationship matrices from  
670 dense SNP arrays for the prediction of genetic potential in unreplicated multilocation plantings of apple  
671 progeny. *Acta Hortic.* 2016;275–82.
- 672 40. Furlani RCM, Moraes MLT de, Resende MDV de, Furlani Junior E, Gonçalves P de S, Valério Filho  
673 WV, et al. Estimation of variance components and prediction of breeding values in rubber tree breeding  
674 using the REML/BLUP procedure. *Genet. Mol. Biol.* 2005;28:271–6.
- 675 41. Hardner CM, Healey AL, Downes G, Herberling M, Gore PL. Improving prediction accuracy and  
676 selection of open-pollinated seed-lots in *Eucalyptus dunnii* Maiden using a multivariate mixed model  
677 approach. *Ann. For. Sci.* 2016;73:1035–46.
- 678 42. Imai A, Kuniga T, Yoshioka T, Nonaka K, Mitani N, Fukamachi H, et al. Evaluation of the best linear  
679 unbiased prediction method for breeding values of fruit-quality traits in citrus. *Tree Genet. Genomes*.  
680 2016;12:119.
- 681 43. Minamikawa MF, Nonaka K, Kaminuma E, Kajiya-Kanegae H, Onogi A, Goto S, et al. Genome-wide  
682 association study and genomic prediction in citrus: Potential of genomics-assisted breeding for fruit  
683 quality traits. *Sci. Rep.* 2017;7:4721.
- 684 44. Hill WG, Goddard ME, Visscher PM. Data and theory point to mainly additive genetic variance for  
685 complex traits. *PLOS Genet.* 2008;4:e1000008.
- 686 45. Kumar S, Molloy C, Muñoz P, Daetwyler H, Chagne D, Volz R. Genome-enabled estimates of additive  
687 and nonadditive genetic variances and prediction of apple phenotypes across environments. *G3*.  
688 2015;5:2711–8.
- 689 46. Iezzoni A, Weebadde C, Luby J, Yue C, van de Weg E, Fazio G, et al. RosBREED: enabling marker-  
690 assisted breeding in Rosaceae. *Acta Hortic.* 2010;859:389–94.
- 691 47. Long L, Kaiser C. Sweet cherry rootstocks for the Pacific Northwest. Corvallis: Oregon State  
692 University; 2010 p. 1–8. Report No.: PNW 619.

- 693 48. Peace C, Luby J, Van de Weg WE, Bink M, Iezzoni A. A strategy for developing representative  
694 germplasm sets for systematic QTL validation, demonstrated for apple, peach, and sweet cherry. *Tree*  
695 *Genet. Genomes*. 2014;10:1679–94.
- 696 49. Chavoshi M, Watkins C, Oraguzie B, Zhao Y, Iezzoni A, Oraguzie N. Phenotyping protocol for sweet  
697 cherry (*Prunus avium* L.) to facilitate an understanding of trait inheritance. *Am. Pomol. Soc.* 2014;68:125–  
698 34.
- 699 50. Washington State University. AgWeatherNet Roza Station Data [Internet]. AgWeatherNet. [cited 2017  
700 Jul 11]. Available from: [www.weather.wsu.edu](http://www.weather.wsu.edu)
- 701 51. McMaster G, Wilhelm W. Growing degree-days: one equation, two interpretations. *Agric. For.*  
702 *Meteorol.* 1997;87:291–300.
- 703 52. Peace C, Bassil N, Main D, Ficklin S, Rosyara UR, Stegmeir T, et al. Development and evaluation of  
704 a genome-wide 6K SNP Array for diploid sweet cherry and tetraploid sour cherry. *PLoS ONE*.  
705 2012;7:e48305.
- 706 53. Cai L, Voorrips RE, van de Weg E, Peace C, Iezzoni A. Genetic structure of a QTL hotspot on  
707 chromosome 2 in sweet cherry indicates positive selection for favorable haplotypes. *Mol. Breed.*  
708 2017;37:85.
- 709 54. Browning BL, Browning SR. A unified approach to genotype imputation and haplotype-phase  
710 inference for large data sets of trios and unrelated individuals. *Am. J. Hum. Genet.* 2009;84:210–23.
- 711 55. Wimmer V, Albrecht T, Auinger H-J, Schoen C-C. Synbreed: a framework for the analysis of genomic  
712 prediction data using R. *Bioinformatics*. 2012;28:2086–7.
- 713 56. Butler D, Cullis B, Gilmour A, Gogel B. Analysis of mixed models for S language environments:  
714 ASReml-R Reference Manual (version 3). The State of Queensland, Department of Primary Industries  
715 and Fisheries; 2009.
- 716 57. R Development Core Team. R: A language and environment for statistical computing [Internet]. 2011.  
717 Available from: <http://www.R-project.org/>
- 718 58. Endelman JB. Ridge regression and other kernels for genomic selection with R package rrBLUP.  
719 *Plant Genome*. 2011;4:25–255.
- 720 59. VanRaden PM. Efficient methods to compute genomic predictions. *J. Dairy Sci.* 2008;91:4414–23.
- 721 60. Su G, Christensen OF, Ostensen T, Henryon M, Lund MS. Estimating additive and non-additive  
722 genetic variances and predicting genetic merits using genome-wide dense single nucleotide  
723 polymorphism markers. *PLOS ONE*. 2012;7:e45293.
- 724 61. Piaskowski J. Genomic Dominance Relationship Matrix [Internet]. 2017. Available from:  
725 <https://github.com/jpiaskowski/Genomic-Dominance-Relationship-Matrix>
- 726 62. Brien C. asremIPlus [Internet]. 2016. Available from: [https://cran.r-](https://cran.r-project.org/web/packages/asremIPlus/asremIPlus.pdf)  
727 [project.org/web/packages/asremIPlus/asremIPlus.pdf](https://cran.r-project.org/web/packages/asremIPlus/asremIPlus.pdf)
- 728 63. Gabriel K. The biplot graphic display of matrices with application to principal component analysis.  
729 *Biometrika*. 1971;58:453–67.
- 730 64. Rodriguez-Almeida FA, Van Vleck LD, Willham RL, Northcutt SL. Estimation of non-additive genetic  
731 variances in three synthetic lines of beef cattle using an animal model. *J. Anim. Sci.* 1995;73:1002–11.

- 732 65. Pante M, Gjerde B, McMillan I, Miszta I. Estimation of additive and dominance genetic variances for  
733 body weight at harvest in rainbow trout, *Oncorhynchus mykiss*. *Aquaculture*. 2002;204:383–92.
- 734 66. Gallardo JA, Lhorente JP, Neira R. The consequences of including non-additive effects on the genetic  
735 evaluation of harvest body weight in Coho salmon (*Oncorhynchus kisutch*). *Genet. Sel. Evol.* 2010;42:19.
- 736 67. Gamal El-Dien O, Ratcliffe B, Klapste J, Porth I, Chen C, El-Kassaby YA. Implementation of the  
737 realized genomic relationship matrix to open-pollinated white spruce family testing for disentangling  
738 additive from nonadditive genetic effects. *G3*. 2016;6:743–53.
- 739 68. Wolfe MD, Kulakow P, Rabbi IY, Jannink J-L. Marker-based estimates reveal significant non-additive  
740 effects in clonally propagated cassava (*Manihot esculenta*): implications for the prediction of total genetic  
741 value and the selection of varieties. *G3*. 2016;
- 742 69. Ceballos H, Kawuki RS, Gracen VE, Yencho GC, Hershey CH. Conventional breeding, marker-  
743 assisted selection, genomic selection and inbreeding in clonally propagated crops: a case study for  
744 cassava. *Theor. Appl. Genet.* 2015;128:1647–67.
- 745 70. Zhao Y, Athanson B, Whiting M, Oraguzie N. Pedicel-fruit retention force in sweet cherry (*Prunus*  
746 *avium* L.) varies with genotype and year. *Sci. Hortic.* 2013;150:135–41.
- 747 71. Schmitz CA, Clark MD, Luby JJ, Bradeen JM, Guan Y, Evans K, et al. Fruit texture phenotypes of the  
748 RosBREED U.S. apple reference germplasm set. *HortScience*. 2013;48:296–303.
- 749 72. Cantín CM, Gogorcena Y, Moreno MÁ. Analysis of phenotypic variation of sugar profile in different  
750 peach and nectarine [*Prunus persica* (L.) Batsch] breeding progenies. *J. Sci. Food Agric.* 2009;89:1909–  
751 17.
- 752 73. Mathey MM, Mookerjee S, Mahoney LL, Gündüz K, Rosyara U, Hancock JF, et al. Genotype by  
753 environment interactions and combining ability for strawberry families grown in diverse environments.  
754 *Euphytica*. 2017;213:112.
- 755 74. Clark S, van de Werf J. Genomic best unbiased linear prediction (gBLUP) for the estimation of  
756 genomic breeding values. In: Gondro C, van de Werf J, Hayes B, editors. *Genome-Wide Assoc. Stud.*  
757 *Genomic Predict.* Springer; 2013. p. 321–30.
- 758 75. Heslot N, Jannink J-L, Sorrells ME. Perspectives for genomic selection applications and research in  
759 plants. *Crop Sci.* 2015;55:1–12.
- 760 76. Dirlwanger E, Quero-Garcia J, Le Dantec L, Lambert P, Ruiz D, Dondini L, et al. Comparison of the  
761 genetic determinism of two key phenological traits, flowering and maturity dates, in three *Prunus* species:  
762 peach, apricot and sweet cherry. *Heredity*. 2012;109:280–92.
- 763 77. Kim Y, Kimball JS, Didan K, Henebry GM. Response of vegetation growth and productivity to spring  
764 climate indicators in the conterminous United States derived from satellite remote sensing data fusion.  
765 *Agric. For. Meteorol.* 2014;194:132–43.
- 766 78. Zhang G, Sebolt A, Sooriyapathirana S, Wang D, Bink M, Olmstead J, et al. Fruit size QTL analysis of  
767 an F1 population derived from a cross between a domesticated sweet cherry cultivar and a wild forest  
768 sweet cherry. *Tree Genet. Genomes*. 2010;6:25–36.
- 769 79. De Franceschi P, Stegmeir T, Cabrera A, van der Knaap E, Rosyara UR, Sebolt AM, et al. Cell  
770 number regulator genes in *Prunus* provide candidate genes for the control of fruit size in sweet and sour  
771 cherry. *Mol. Breed.* 2013;32:311–26.

- 772 80. Campoy JA, Le Dantec L, Barreneche T, Dirlwanger E, Quero-García J. New insights into fruit  
773 firmness and weight control in sweet cherry. *Plant Mol. Biol. Report.* 2015;33:783–96.
- 774 81. Bassi D, Bartolozzi F, Muzzi E. Patterns and heritability of carboxylic acids and soluble sugars in fruits  
775 of apricot (*Prunus armeniaca* L.). *Plant Breed.* 1996;115:67–70.
- 776 82. Brooks SJ, Moore JN, Murphy JB. Quantitative and qualitative changes in sugar content of peach  
777 genotypes [*Prunus persica* (L.) Batsch.]. *J. Am. Soc. Hortic. Sci.* 1993;118:97–100.
- 778 83. Genard M, Lescourret F, Gomez L, Habib R. Changes in fruit sugar concentrations in response to  
779 assimilate supply, metabolism and dilution: a modeling approach applied to peach fruit (*Prunus persica*).  
780 *Tree Physiol.* 2003;23:373–85.
- 781 84. Morandi B, Corelli Grappadelli L, Rieger M, Lo Bianco R. Carbohydrate availability affects growth and  
782 metabolism in peach fruit. *Physiol. Plant.* 2008;133:229–41.
- 783 85. Dirlwanger E, Moing A, Rothan C, Svanella L, Pronier V, Guye A, et al. Mapping QTLs controlling  
784 fruit quality in peach (*Prunus persica* (L.) Batsch). *Theor. Appl. Genet.* 1999;98:18–31.
- 785 86. Olmstead J, Lang G. A leaf disk assay for screening sweet cherry genotypes for susceptibility to  
786 powdery mildew. *HortScience.* 2000;35:274–7.
- 787 87. Olmstead J, Lang G, Grove G. Inheritance of powdery mildew resistance in sweet cherry.  
788 *HortScience.* 2001;36:337–40.
- 789 88. Wilfert L, Schmid-Hempel P. The genetic architecture of susceptibility to parasites. *BMC Evol. Biol.*  
790 2008;8:187–187.
- 791 89. Divya B, Biswas A, Robin S, Rabindran R, Joel AJ. Gene interactions and genetics of blast resistance  
792 and yield attributes in rice (*Oryza sativa* L.). *J. Genet.* 2014;93:415–24.
- 793 90. Zhang J, Singh A, Mueller DS, Singh AK. Genome-wide association and epistasis studies unravel the  
794 genetic architecture of sudden death syndrome resistance in soybean. *Plant J. Cell Mol. Biol.*  
795 2015;84:1124–36.
- 796 91. Cach NT, Perez JC, Lenis JI, Calle F, Morante N, Ceballos H. Epistasis in the expression of relevant  
797 traits in cassava (*Manihot esculenta* Crantz) for subhumid conditions. *J. Hered.* 2005;96:586–92.
- 798 92. Oakey H, Verbyla A, Pitchford W, Cullis B, Kuchel H. Joint modeling of additive and non-additive  
799 genetic line effects in single field trials. *Theor. Appl. Genet.* 2006;113:809–19.
- 800 93. Bai W, Zhang H, Zhang Z, Teng F, Wang L, Tao Y, et al. The evidence for non-additive effect as the  
801 main genetic component of plant height and ear height in maize using introgression line populations.  
802 *Plant Breed.* 2010;129:376–84.
- 803 94. Wang D, Salah El-Basyoni I, Stephen Baenziger P, Crossa J, Eskridge KM, Dweikat I. Prediction of  
804 genetic values of quantitative traits with epistatic effects in plant breeding populations. *Heredity.*  
805 2012;109:313–9.
- 806 95. Dudley JW, Johnson GR. Epistatic models and pre-selection of markers improve prediction of  
807 performance in corn. *Mol. Breed.* 2013;32:585–93.
- 808 96. Nazarian A, Gezan SA. Integrating nonadditive genomic relationship matrices into the study of genetic  
809 architecture of complex traits. *J. Hered.* 2016;107:153–62.



- 810 97. Cockerham CC. An extension of the concept of partitioning hereditary variance for analysis of  
811 covariances among relatives when epistasis is present. *Genetics*. 1954;39:859–82.
- 812 98. Holland J. Epistasis and plant breeding. In: Janick J, editor. *Plant Breed. Rev.* Oxford, UK: Oxford,  
813 UK: John Wiley & Sons, Inc.; 2010. p. 27–92.
- 814 99. Tao R, Iezzoni AF. The S-RNase-based gametophytic self-incompatibility system in *Prunus* exhibits  
815 distinct genetic and molecular features. *Sci. Hortic.* 2010;124:423–33.
- 816 100. Heffner EL, Sorrells ME, Jannink J-L. Genomic selection for crop improvement. *Crop Sci.*  
817 2009;49:1–12.
- 818 101. Ratcliffe B, El-Dien OG, Klapste J, Porth I, Chen C, Jaquish B, et al. A comparison of genomic  
819 selection models across time in interior spruce (*Picea engelmannii* x *glauca*) using unordered SNP  
820 imputation methods. *Heredity*. 2015;115:547–55.
- 821 102. Muranty H, Troggio M, Sadok IB, Rifaï MA, Auwerkerken A, Banchi E, et al. Accuracy and responses  
822 of genomic selection on key traits in apple breeding. *Hortic. Res.* 2015;2:15060.
- 823 103. Biscarini F, Nazzicari N, Bink M, Arús P, Aranzana MJ, Verde I, et al. Genome-enabled predictions  
824 for fruit weight and quality from repeated records in European peach progenies. *BMC Genomics.*  
825 2017;18:432.
- 826 104. Garcia MR, Carbonell EA, Asíns MJ. QTL analysis of yield and seed number in Citrus. *Theor. Appl.*  
827 *Genet.* 2000;101:487–93.
- 828 105. Resende MFR, Muñoz P, Acosta JJ, Peter GF, Davis JM, Grattapaglia D, et al. Accelerating the  
829 domestication of trees using genomic selection: accuracy of prediction models across ages and  
830 environments. *New Phytol.* 2012;193:617–24.
- 831 106. Resende RT, Resende MDV, Silva FF, Azevedo CF, Takahashi EK, Silva-Junior OB, et al.  
832 Assessing the expected response to genomic selection of individuals and families in Eucalyptus breeding  
833 with an additive-dominant model. *Heredity*. 2017;119:245–55.
- 834 107. Marulanda JJ, Mi X, Melchinger AE, Xu J-L, Würschum T, Longin CFH. Optimum breeding strategies  
835 using genomic selection for hybrid breeding in wheat, maize, rye, barley, rice and triticale. *Theor. Appl.*  
836 *Genet.* 2016;129:1901–13.
- 837 108. Jung S, Ficklin SP, Lee T, Cheng C-H, Blenda A, Zheng P, et al. The Genome Database for  
838 Rosaceae (GDR): year 10 update. *Nucleic Acids Res.* 2014;42:D1237-44.
- 839
- 840

841 **FIGURE CAPTIONS**

842 **Figure 1:** Violin plots of nine traits by year, adjusted for fixed effects due to year and overlaid with the  
843 observations from each year.

844 **Figure 2:** Heritability and predictive ability of four genetic models for each of nine focus traits.

845 **Figure 3:** Variance components by each year and across years for the full (ADI) model.

846 **Figure 4:** Biplot of genetic values among the RosBREED sweet cherry Crop Reference Set using the  
847 correlation matrix of eight traits. Trait rotations were scaled by the first eigenvalue.

848

849 **ADDITIONAL FILE CAPTIONS**

850 **Additional File 1:** Individuals from the RosBREED sweet cherry Crop Reference set used in this study.  
851 “Self” refers to individuals derived from self-pollination, and “Unk” means that at least one parent is not  
852 known (file extension is .csv).

853 **Additional File 2:** Number of observations (N) and Spearman rank correlations ( $\rho$ ) between genetic  
854 values derived from a single year and the multi-year genetic values using the ADI model (Panel A) or the  
855 phenotypic data (Panel B), genetic values derived from the reduced models and the full model (Panel C),  
856 and breeding values derived from the reduced models and the full model (Panel D) (file extension is  
857 .xlsx).

858 **Additional File 3:** Histogram of the diagonals and off-diagonal from the additive relationship matrix (file  
859 extension is .png).

860 **Additional File 4:** Variance component estimates and standard errors for all RosBREED sweet cherry  
861 traits (file extension is .csv).

862 **Additional File 5:** Variance component percentages for all RosBREED sweet cherry traits (file extension  
863 is .csv).

864 **Additional File 6:** Biplot of genetic values among sweet cherry cultivars and their ancestors using the  
865 correlation matrix of eight traits. Trait rotations were scaled by the first eigenvalue (file extension is .png).

866 **Additional File 7:** Breeding values, dominance values, epistatic values and genetic values of all  
867 individuals for all traits in the RosBREED sweet cherry Crop Reference Set (file extension is .xlsx).

868

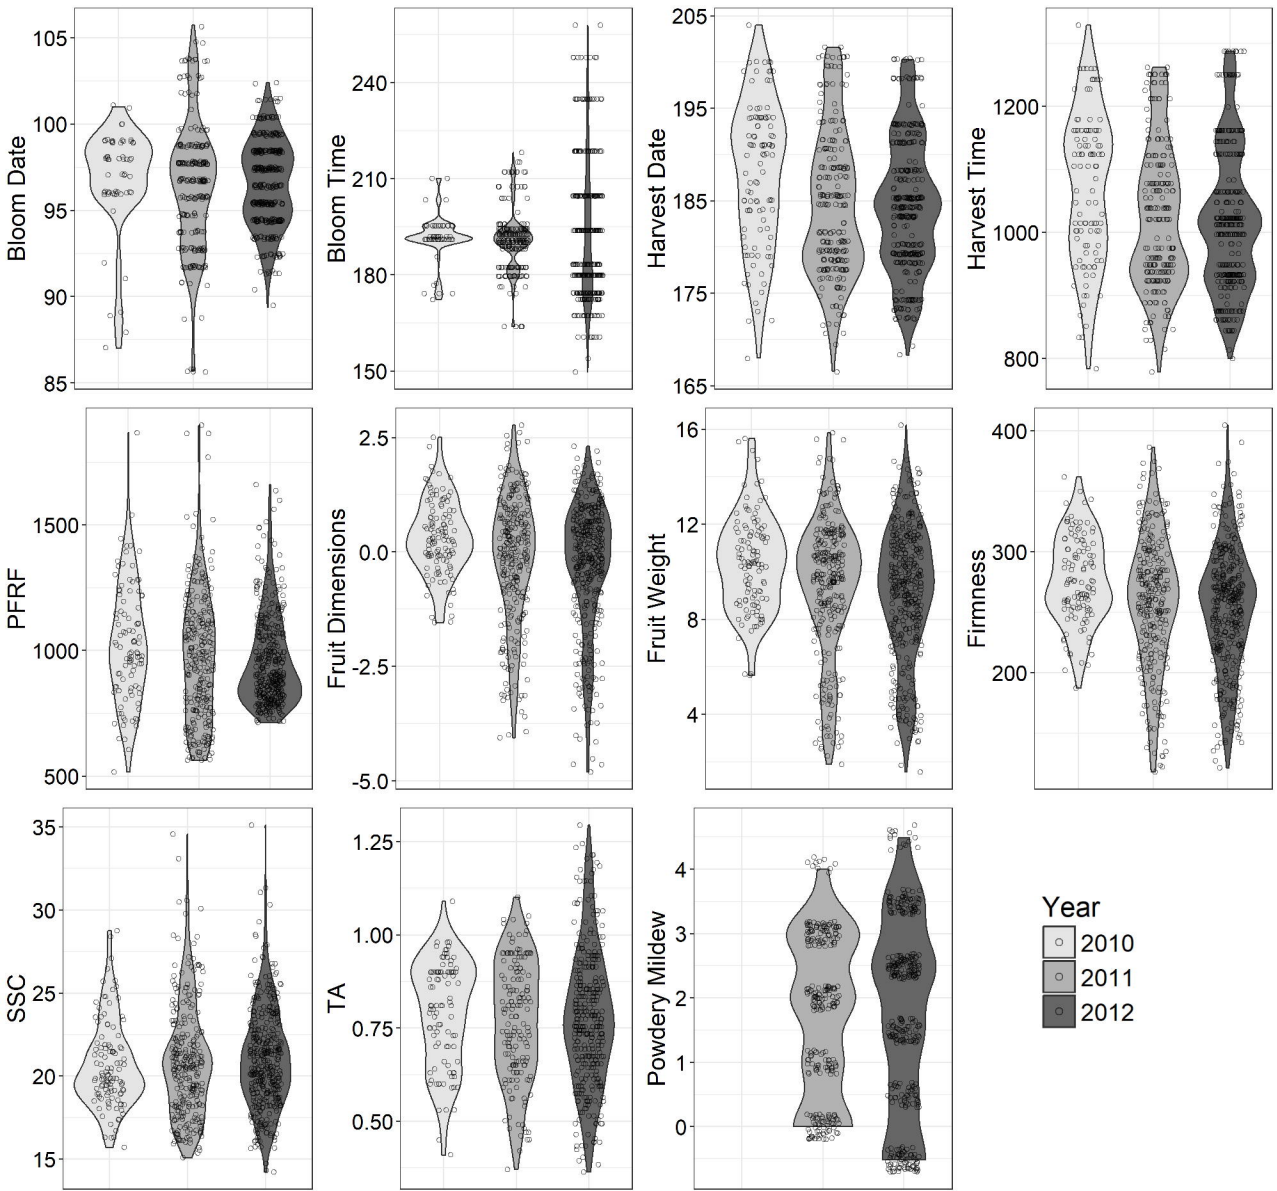

Bloom Date

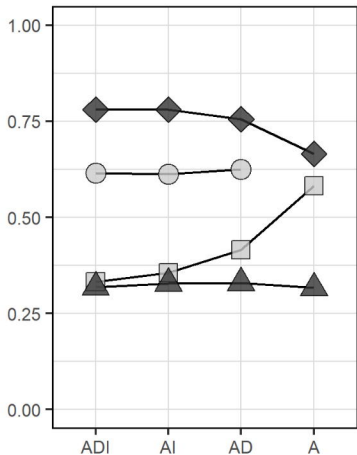

Bloom Time

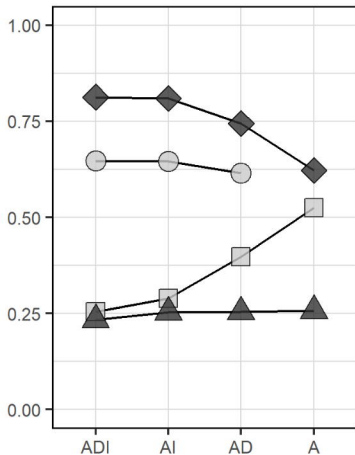

Harvest Date

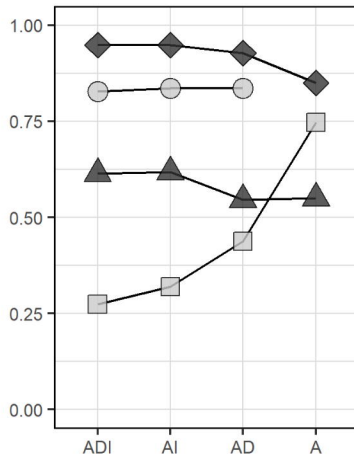

Harvest Time

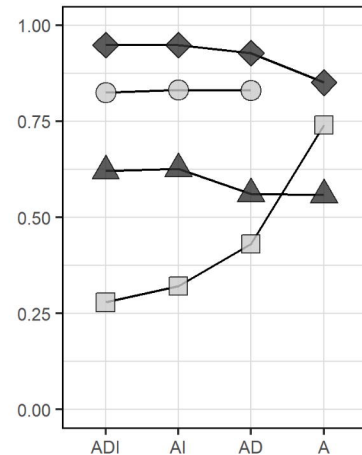

PFRF

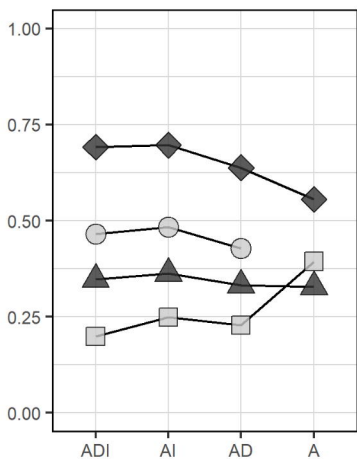

Fruit Dimensions

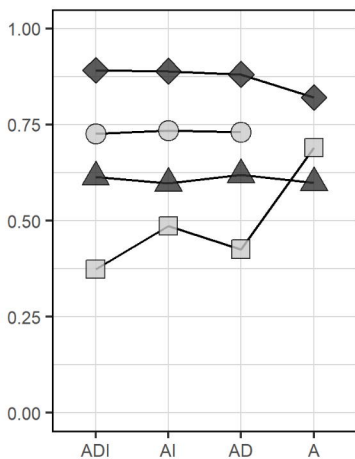

Fruit Weight

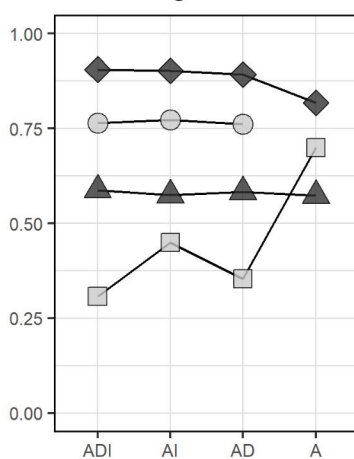

Firmness

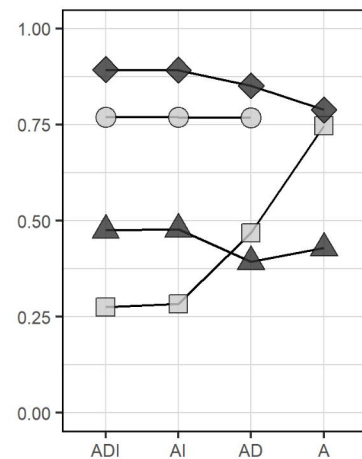

SSC

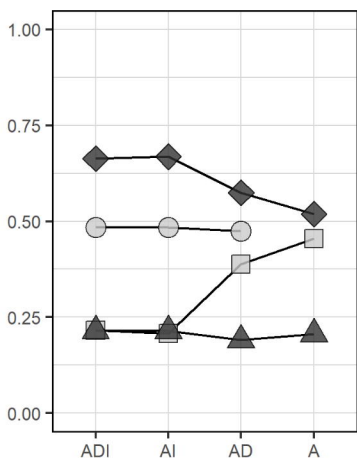

TA

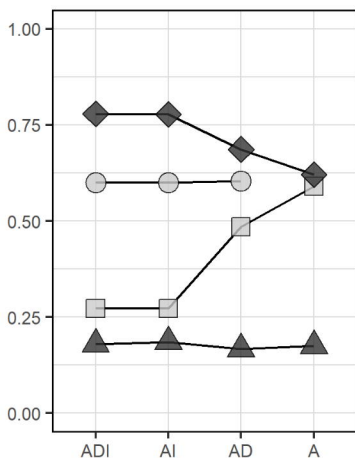

Powdery Mildew

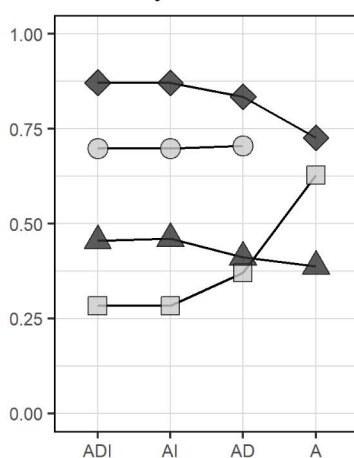

Statistic

- broad-sense heritability
- narrow-sense heritability
- ◆  $r^2$  all data
- ▲  $r^2$  5-fold cross validation

Bloom Date

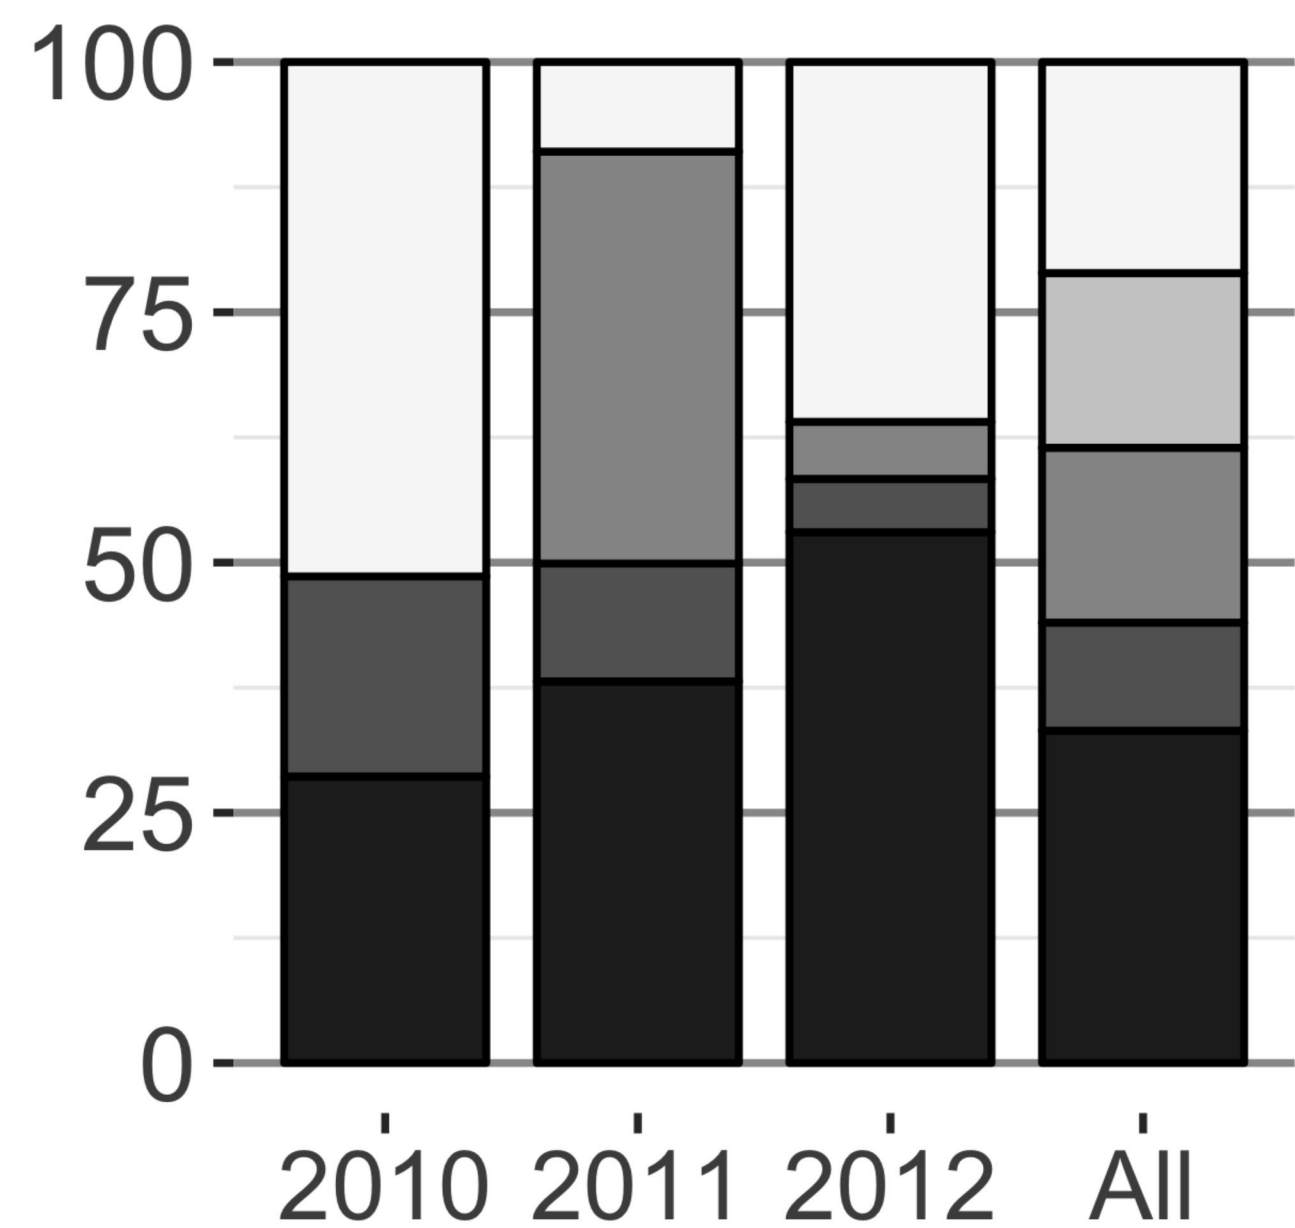

Bloom Time

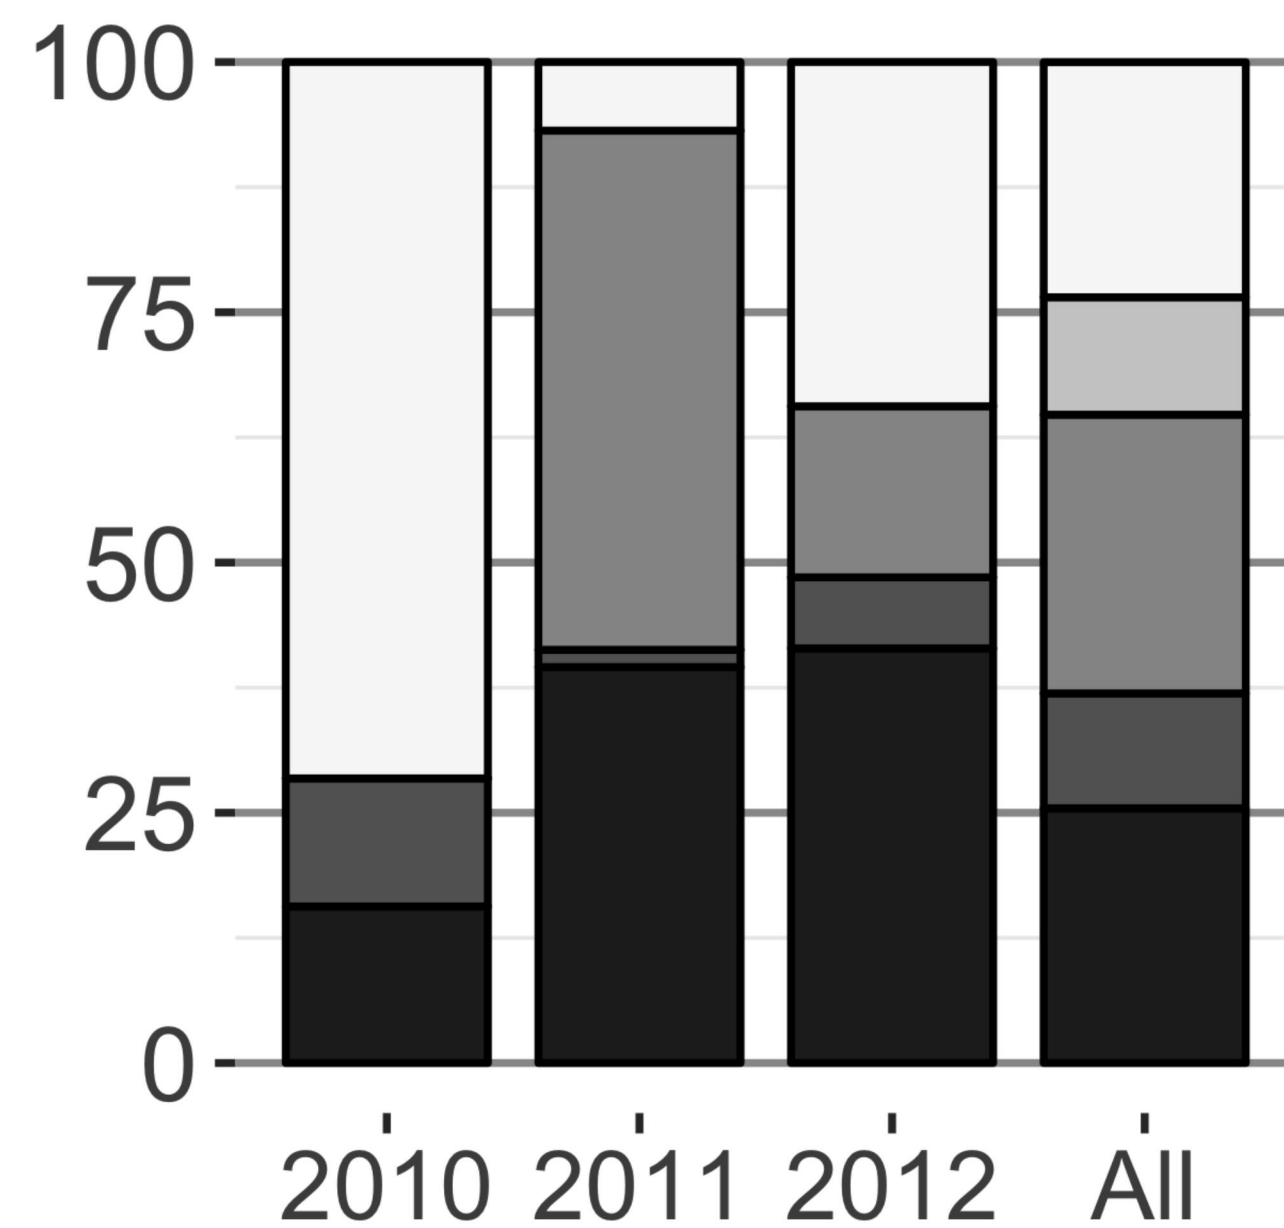

Harvest Date

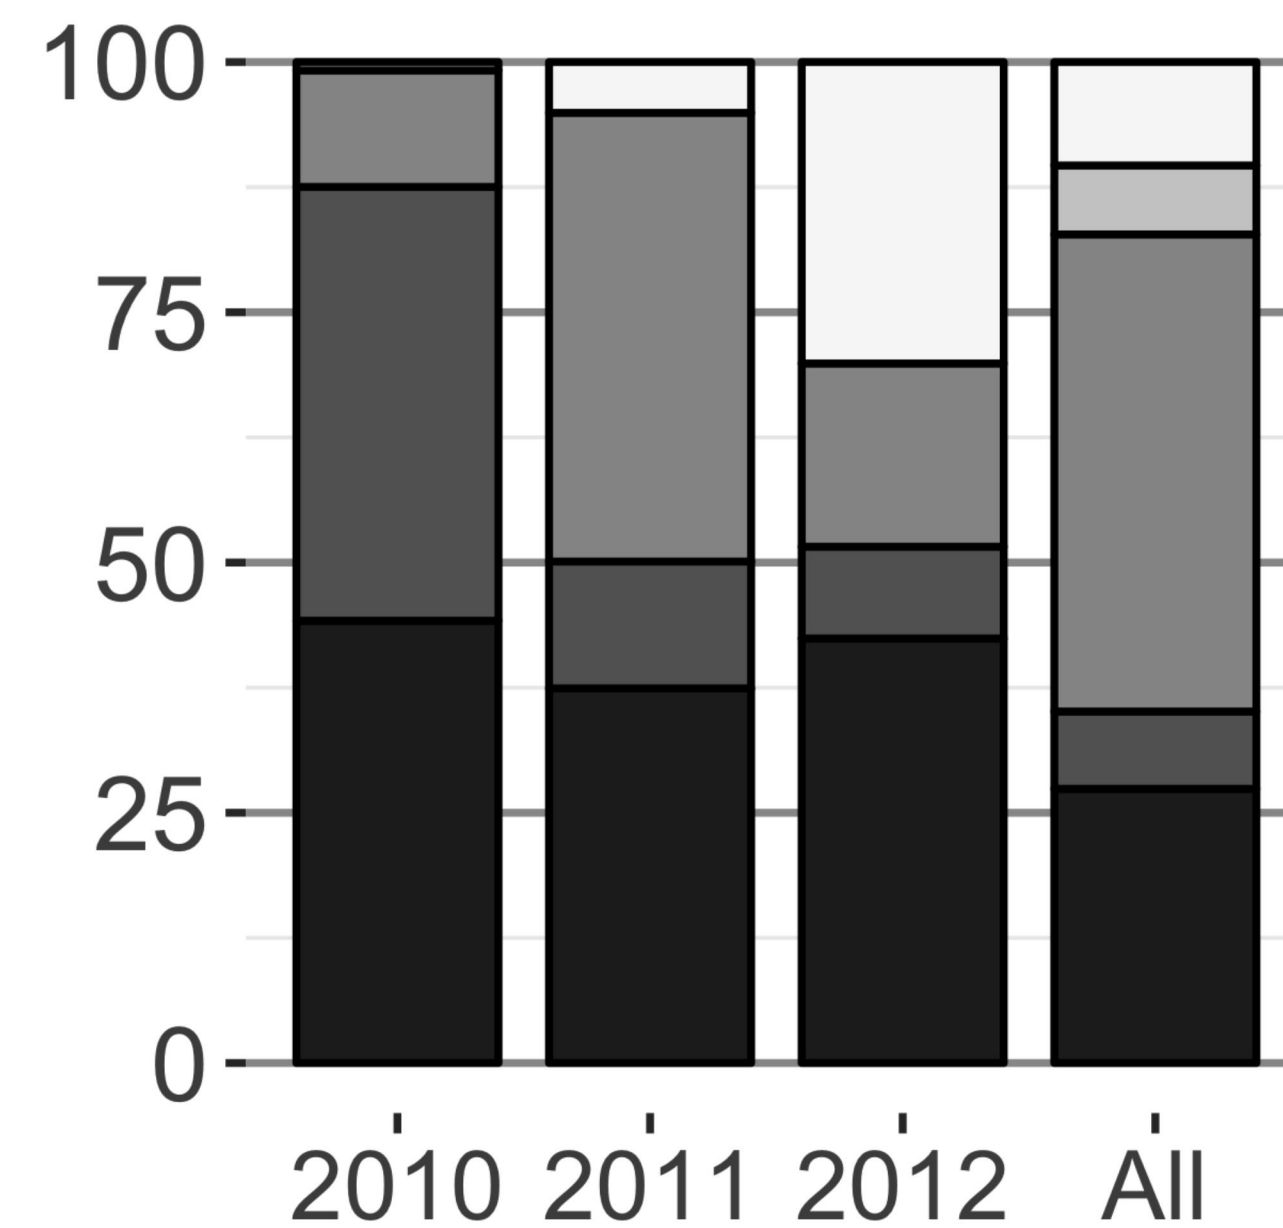

Harvest Time

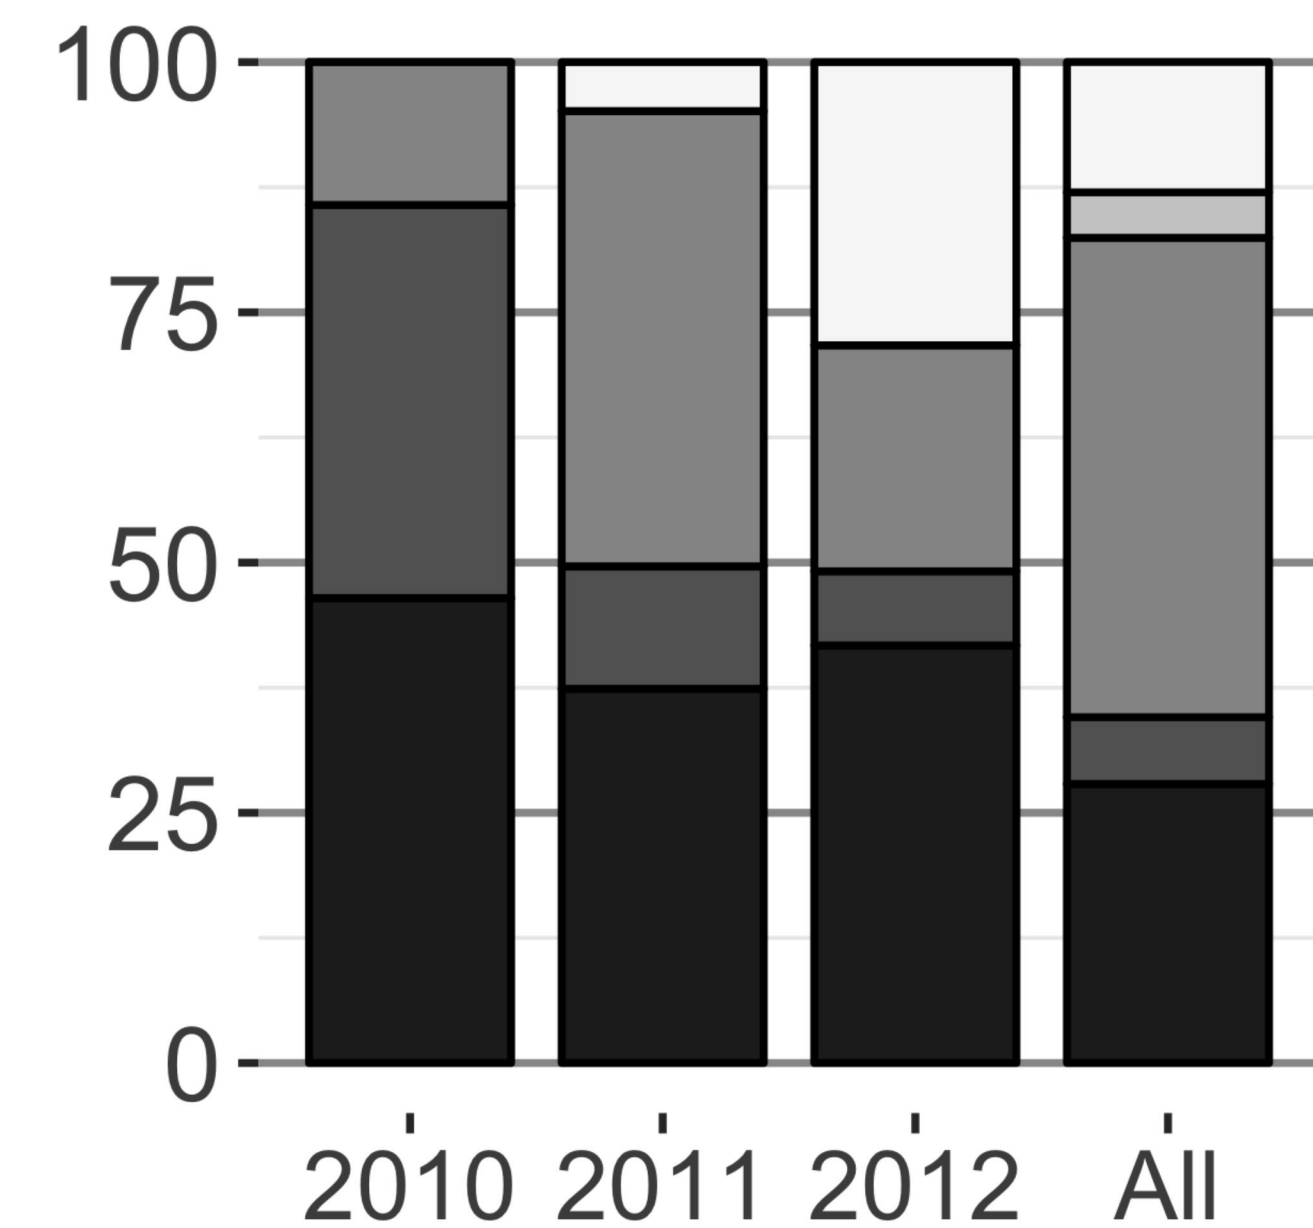

PFRF

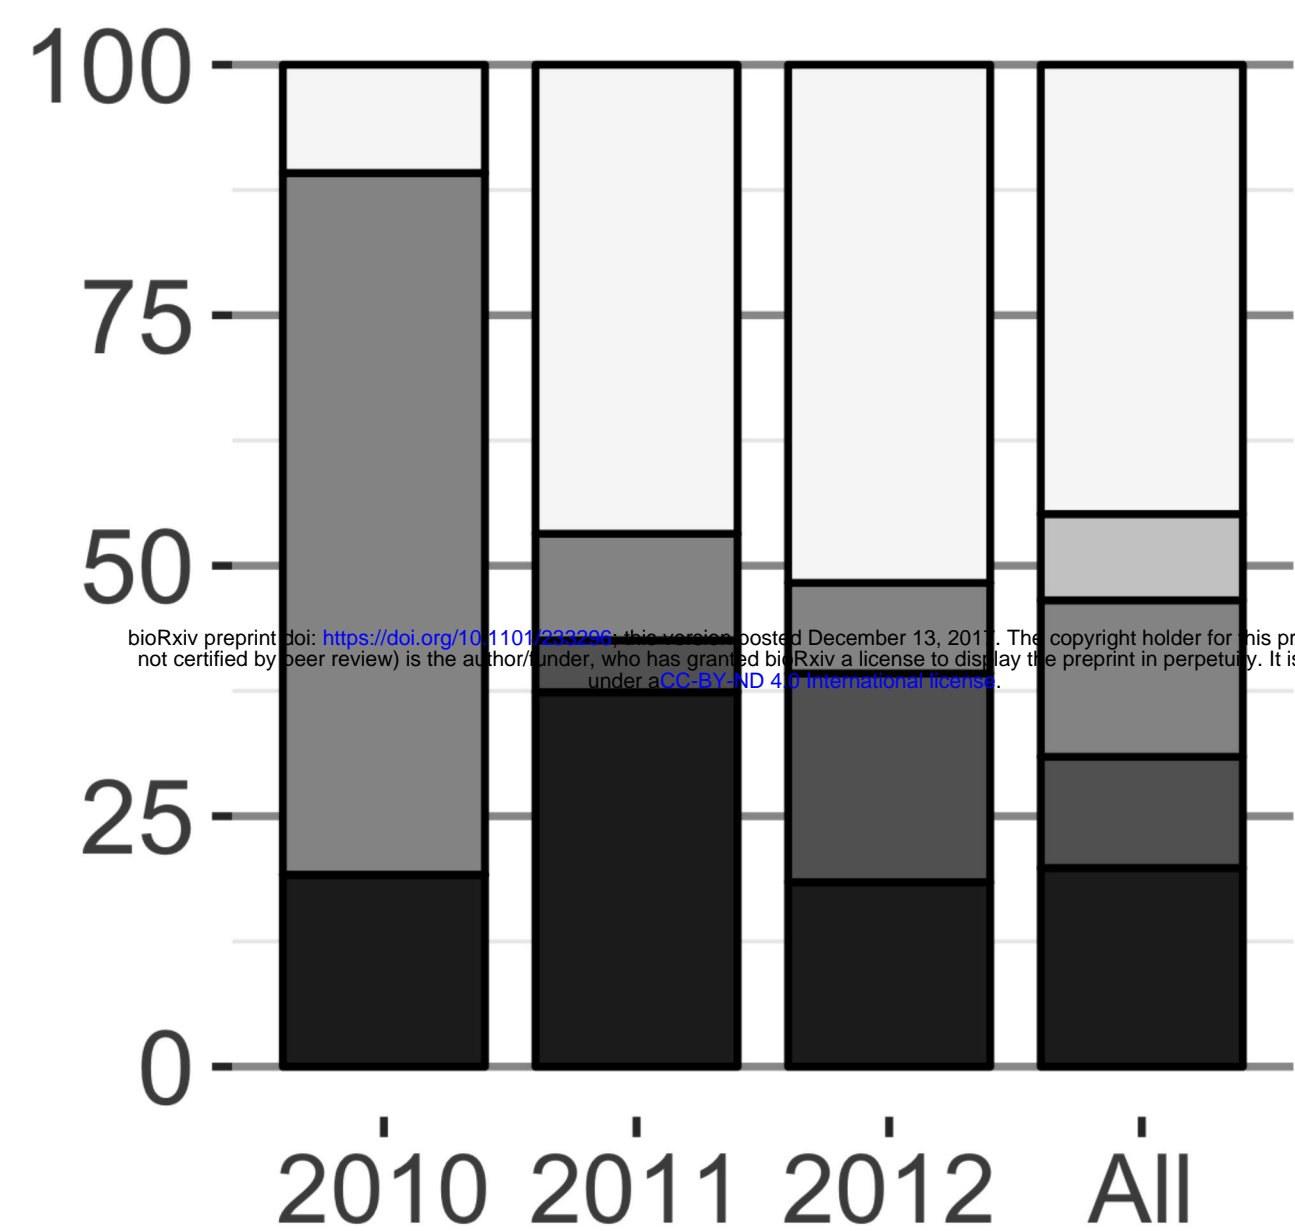

Fruit Dimensions

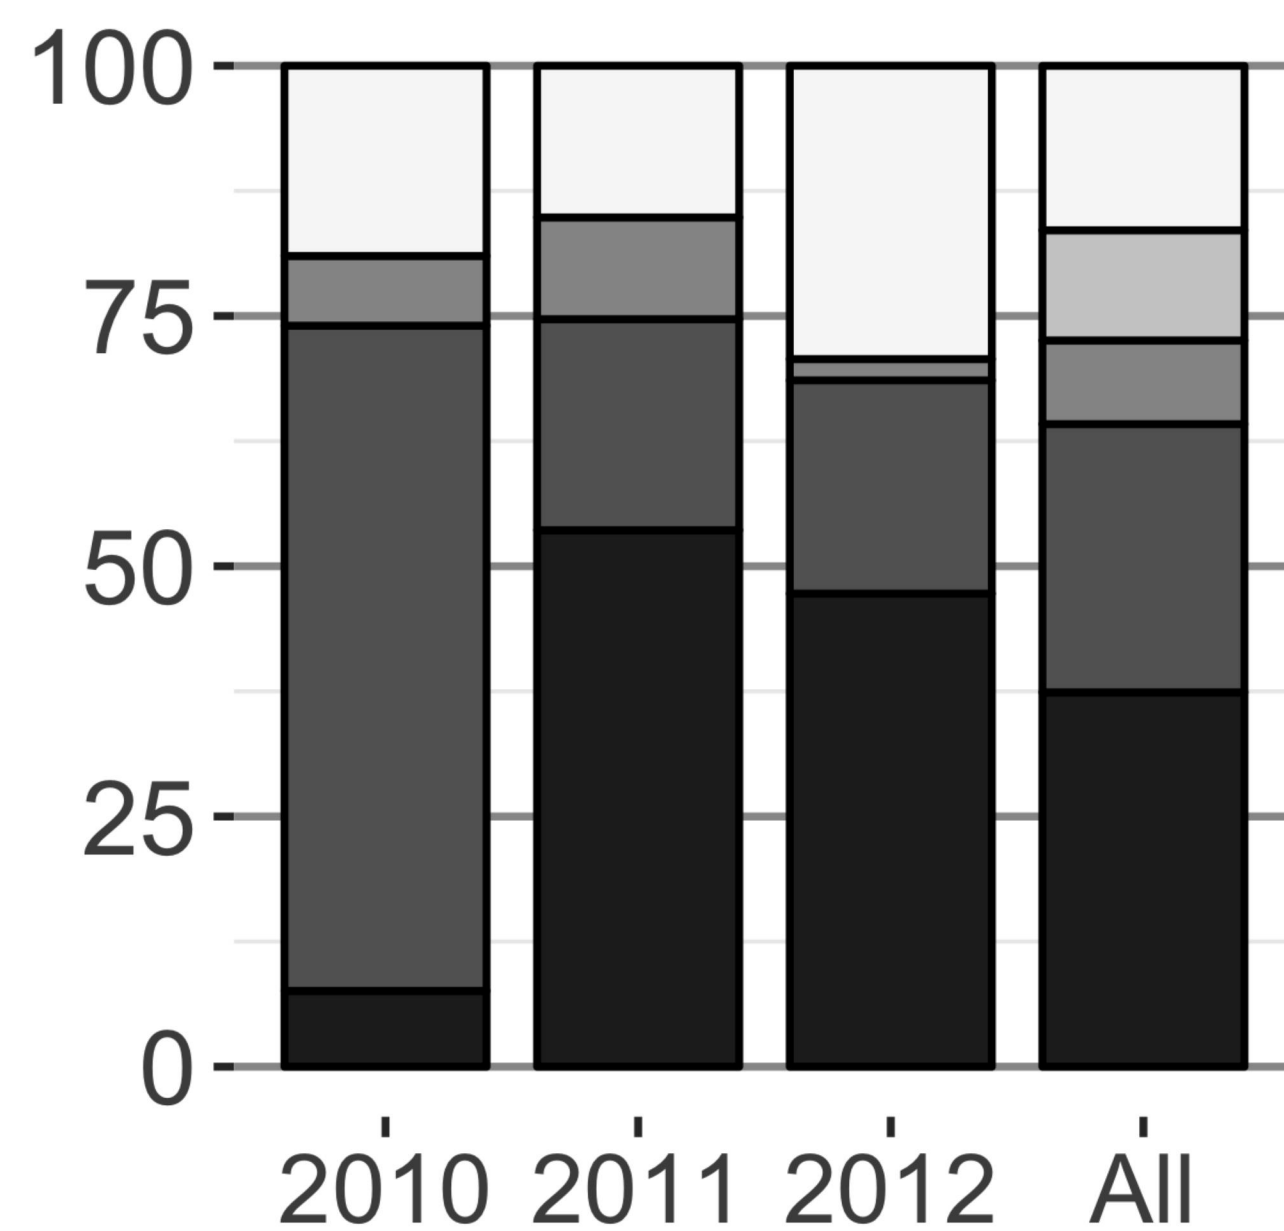

Fruit Weight

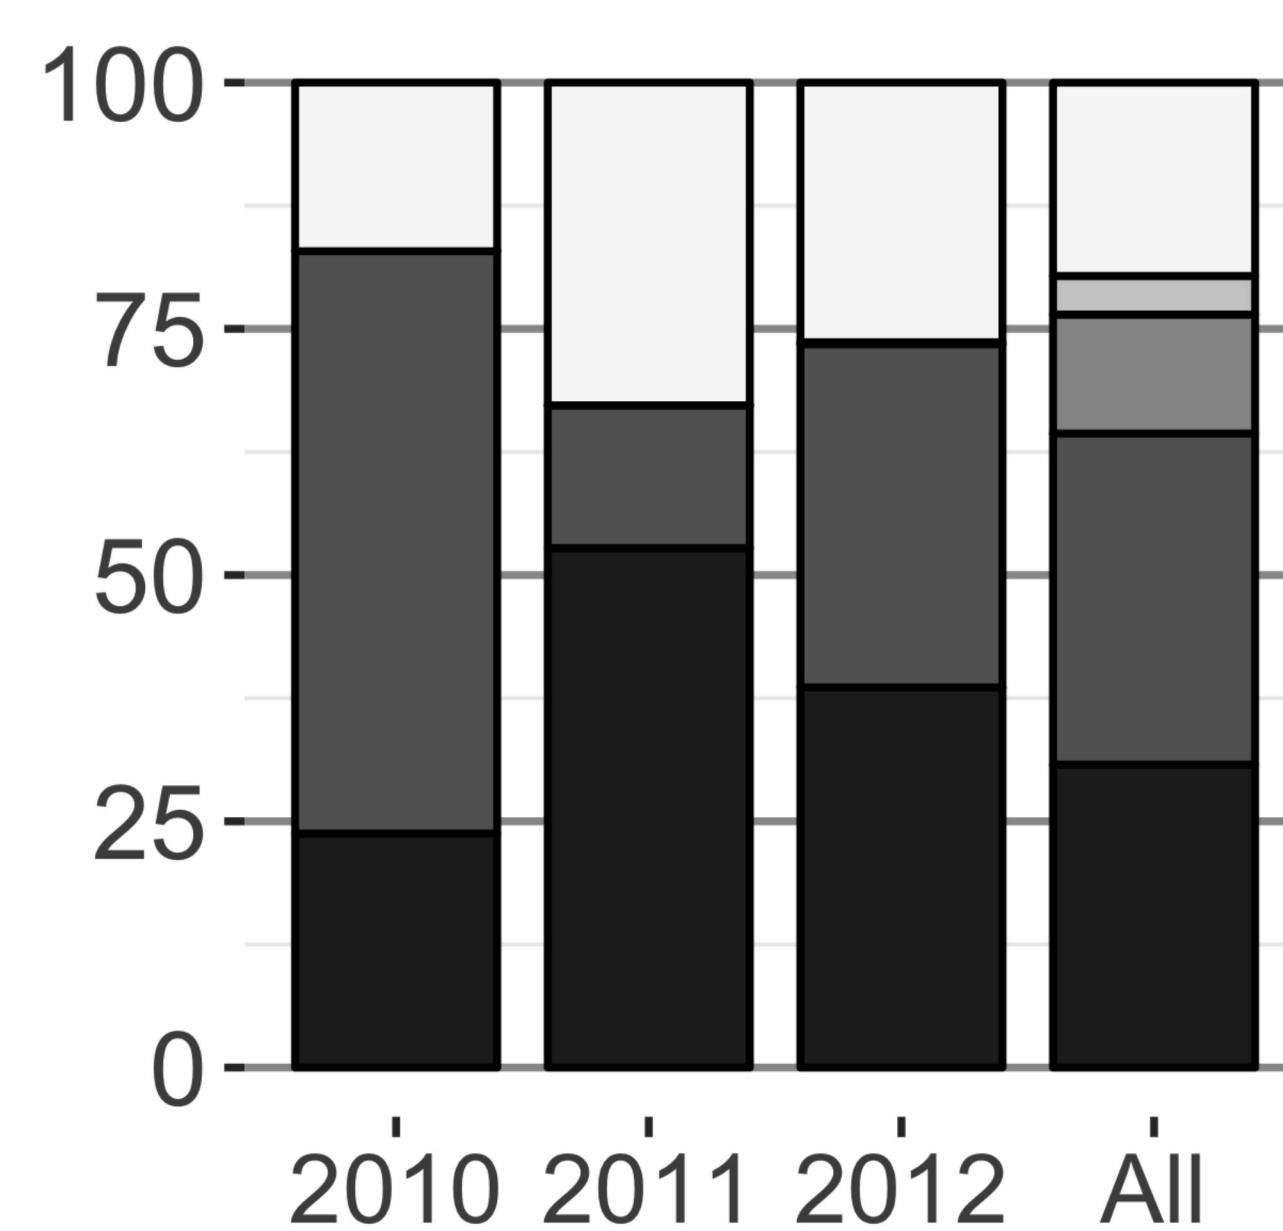

Firmness

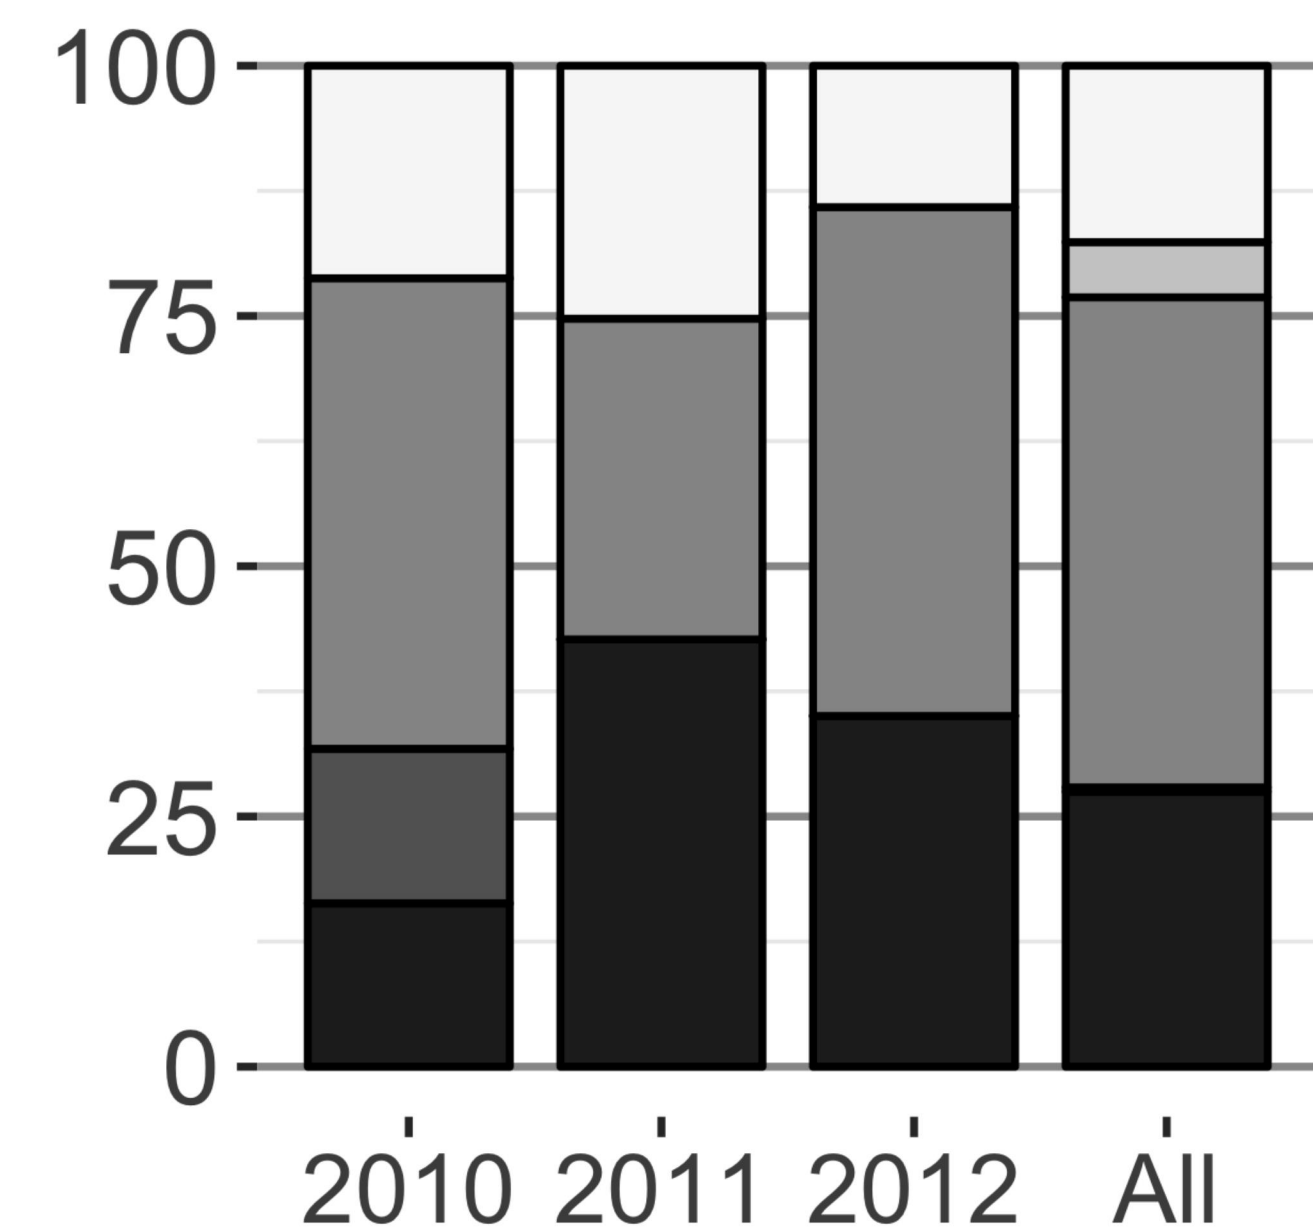

SSC

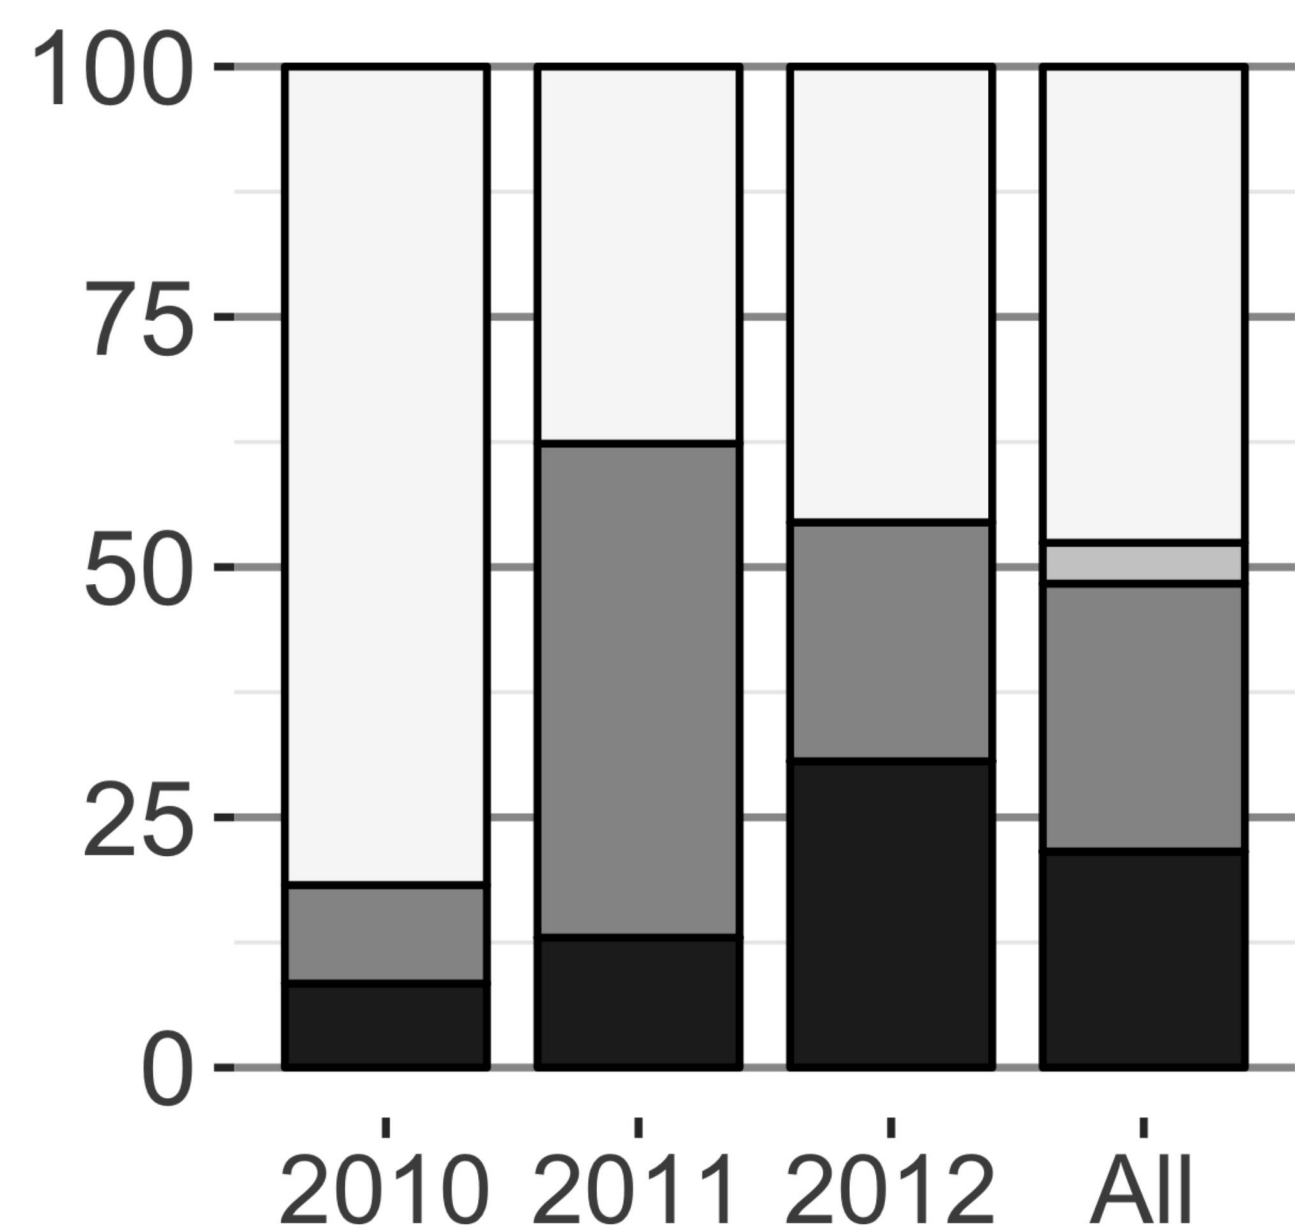

TA

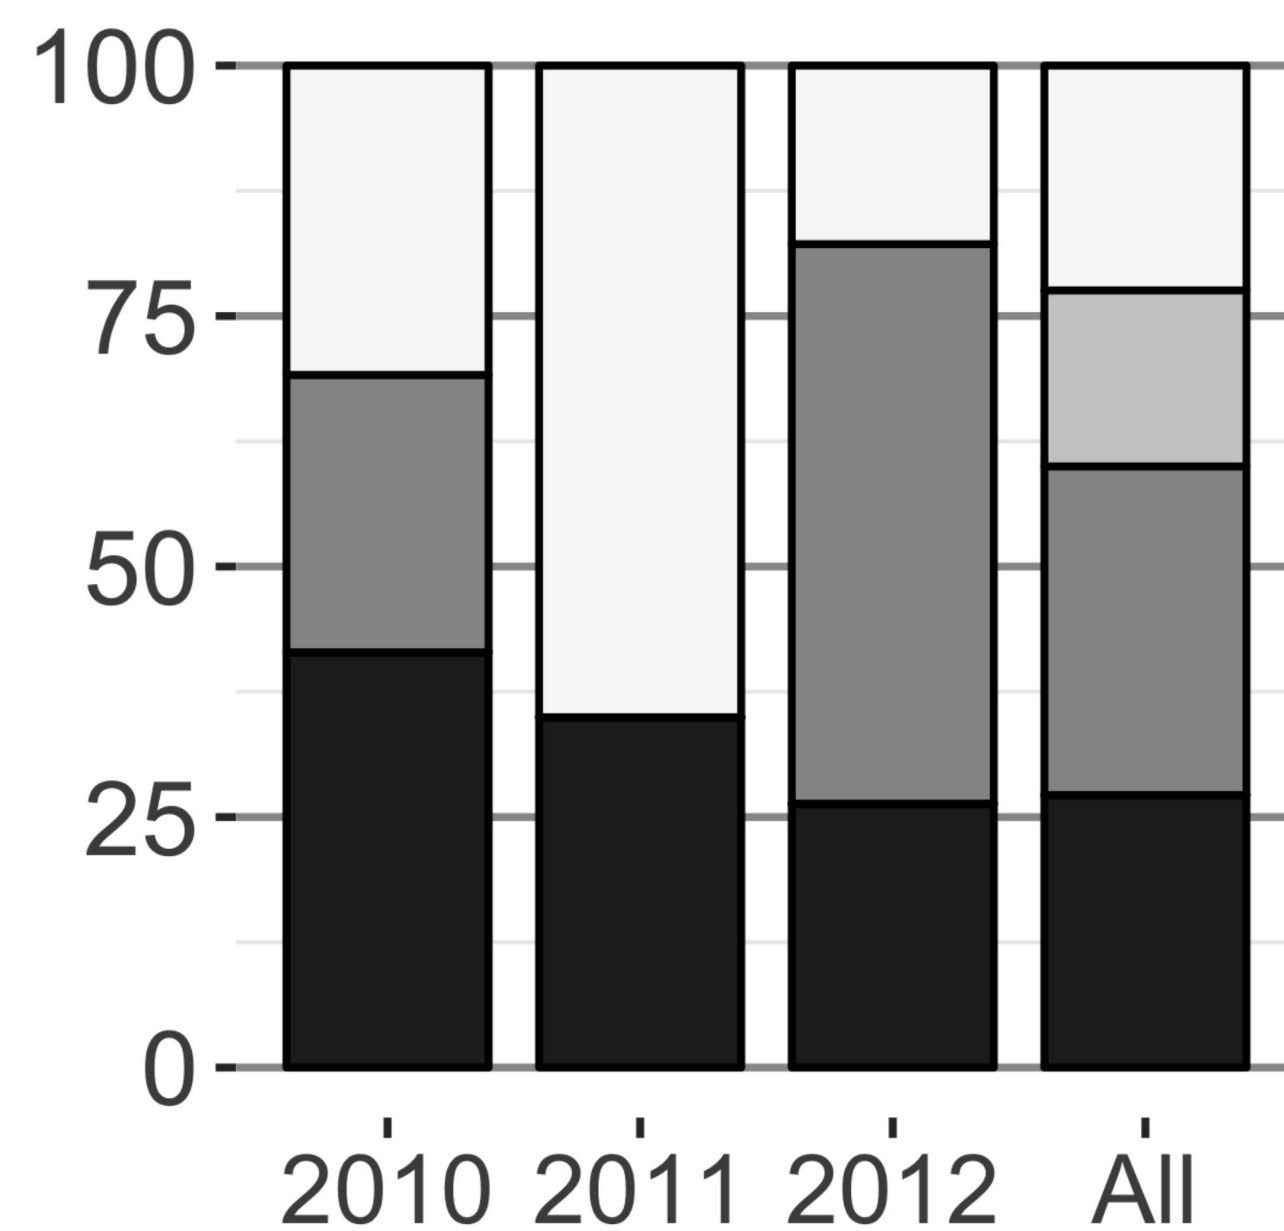

Powdery Mildew

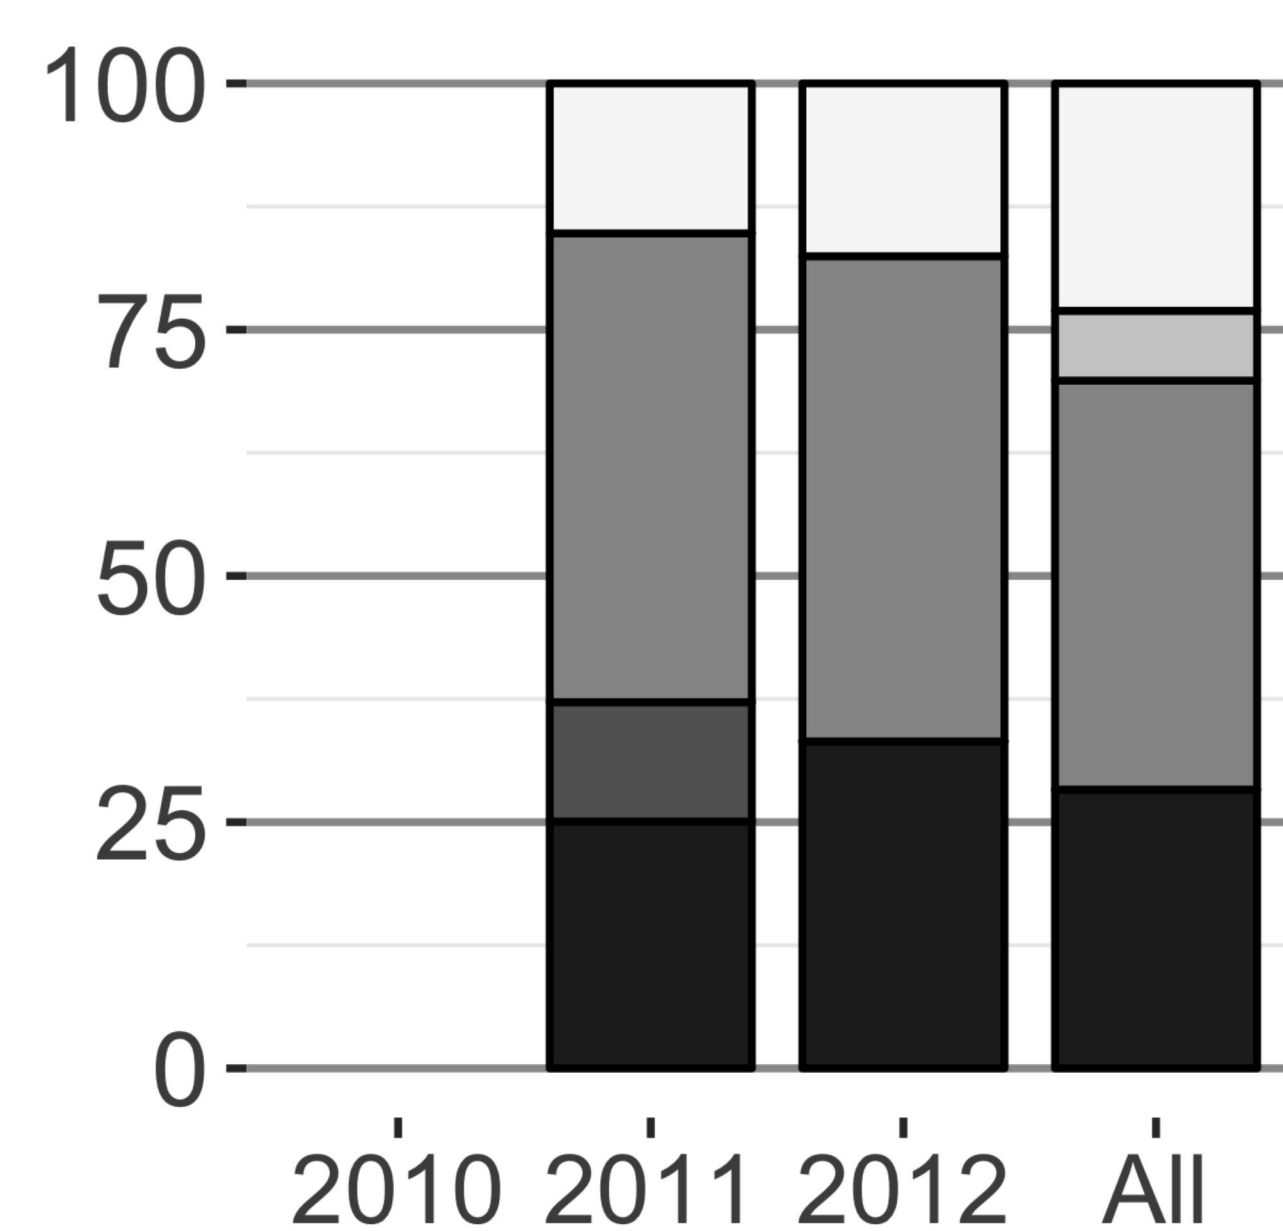

Variance Sources

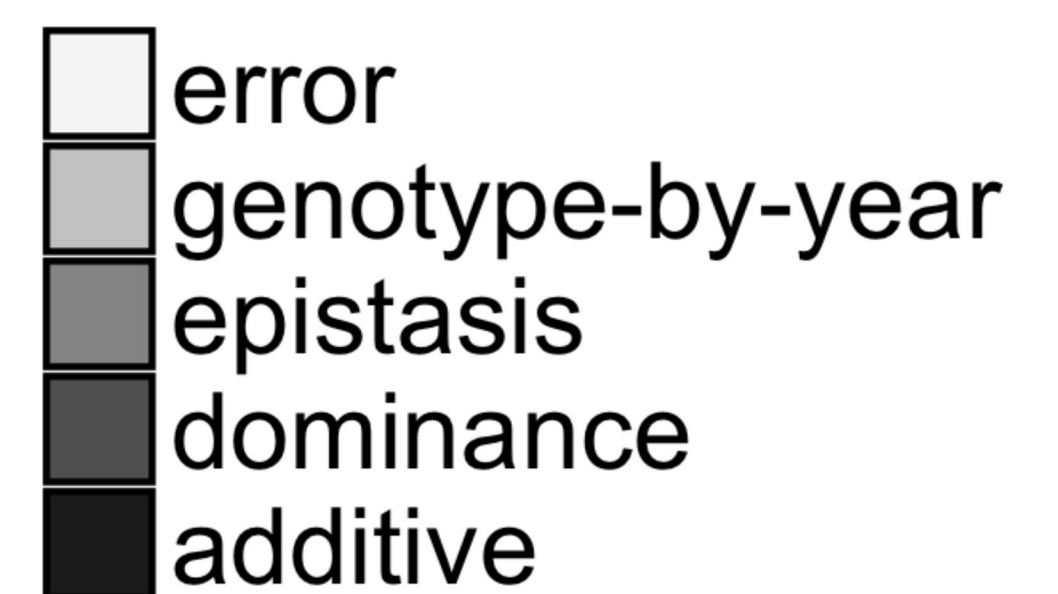

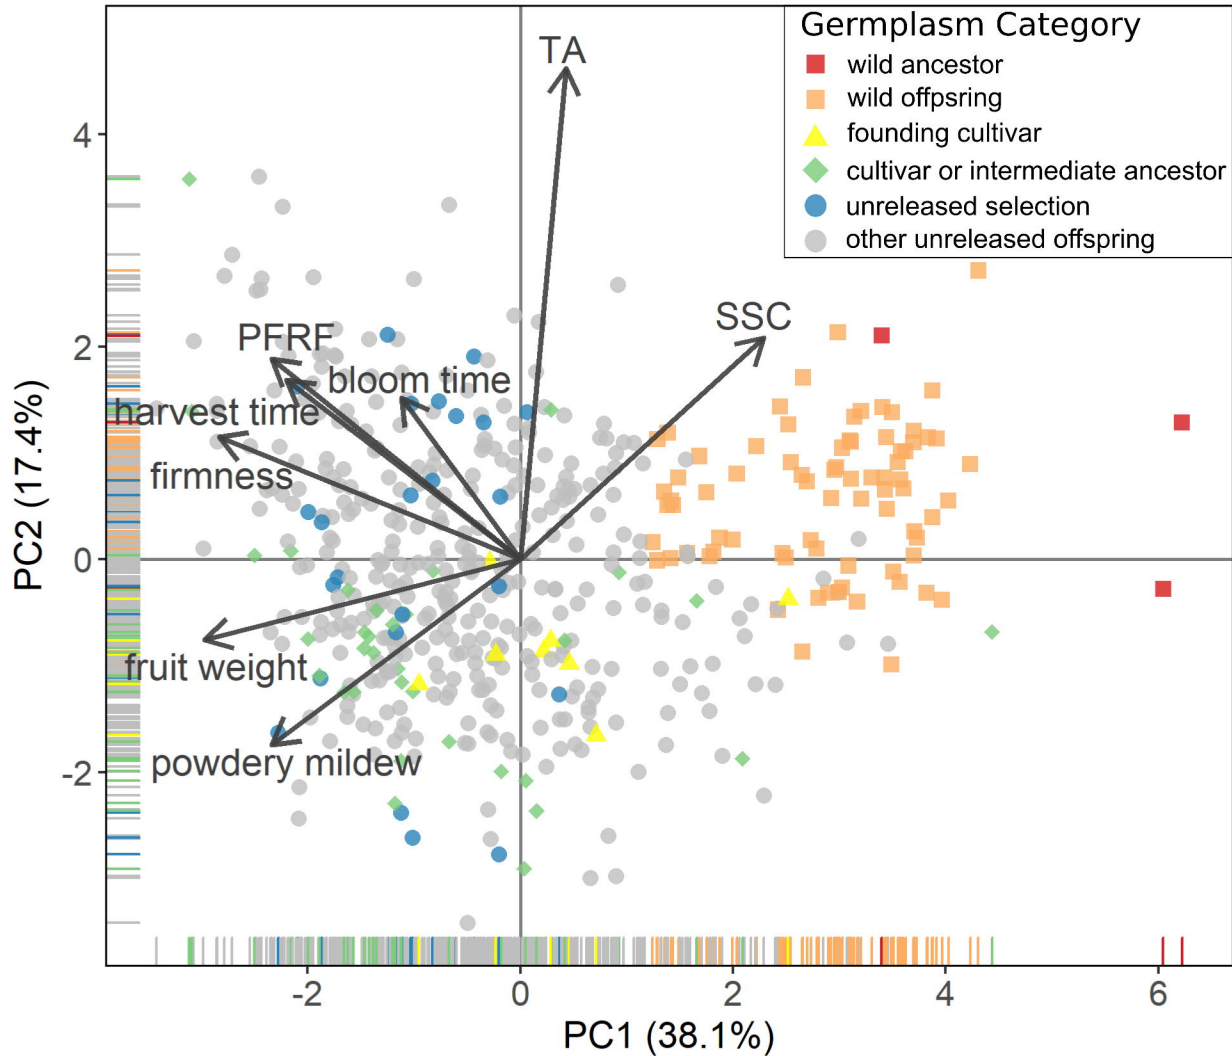

Source: https://www.biorxiv.org/content/10.1101/233296v1.full.pdf
